# Supplementary material for: Selective neuronal targeting, protection and signaling network analysis via dopamine-mediated mesoporous silica nanoparticles
Source: Royal Society of Chemistry journal article supplement (doi:10.1039/c5md00038f), 2015-01-01
Supplement: c5md00038f1.xlsx [file c5md00038f1.xlsx]

## Sheet: Dopmaine100_MSN-Triple
Accession	OK	Description	Score	Unique	Dopamine-T100:Control-Dopamine_Ratio	Dopamine-T100:Control-Dopamine_Log(e)Ratio	Dopamine-T100:Control-Dopamine_Log(e)StdDev	Dopamine-T100:Control-Dopamine__P	GSH-DOPAMINE:Control-Dopamine_Ratio	GSH-DOPAMINE:Control-Dopamine_Log(e)Ratio	GSH-DOPAMINE:Control-Dopamine_Log(e)StdDev	GSH-DOPAMINE:Control-Dopamine__P	GSH-DOPAMINE:Dopamine-T100_Ratio	GSH-DOPAMINE:Dopamine-T100_Log(e)Ratio	GSH-DOPAMINE:Dopamine-T100_Log(e)StdDev	GSH-DOPAMINE:Dopamine-T100__P	Control-Dopamine_Rel Profile	Control-Dopamine_Rel Profile SD	Dopamine-T100_Rel Profile	Dopamine-T100_Rel Profile SD	GSH-DOPAMINE_Rel Profile	GSH-DOPAMINE_Rel Profile SD
VDAC2_HUMAN	2	Voltage-dependent anion-selective channel protein 2 OS=Homo sapiens GN=VDAC2 PE=1 SV=2	2708.81		0.57695	-0.55	0.15	0	1.01005	0.01	0.08	0.6	1.75067	0.56	0.16	1	1.16	0.06	0.67	0.07	1.17	0.07
PP1B_HUMAN	2	Serine threonine protein phosphatase PP1 beta catalytic subunit OS Homo sapiens GN PPP1CB PE 2 SV 1	5347.91		0.644036	-0.44	0.02	0	0.932394	-0.07	0.02	0	1.44773	0.37	0.02	1	1.16	0.01	0.75	0.01	1.08	0.01
VINC_HUMAN	2	Isoform 1 of Vinculin OS Homo sapiens GN VCL	2426.63		0.690734	-0.37	0.11	0	1.1275	0.12	0.12	0.96	1.64872	0.5	0.09	1	1.06	0.07	0.73	0.04	1.2	0.08
MATR3_HUMAN	2	Matrin 3 Fragment OS Homo sapiens GN MATR3 PE 2 SV 1	30024.4		0.704688	-0.35	0.01	0	1	0	0.01	0.64	1.43333	0.36	0.01	1	1.11	0.01	0.78	0.01	1.11	0.01
RLA2_HUMAN	2	60S acidic ribosomal protein P2 OS=Homo sapiens GN=RPLP2 PE=1 SV=1	2988.84		0.718924	-0.33	0.11	0	0.951229	-0.05	0.1	0.25	1.32313	0.28	0.11	1	1.12	0.06	0.81	0.06	1.07	0.06
TBB5_HUMAN	2	Tubulin beta chain OS=Homo sapiens GN=TUBB PE=1 SV=2	22194.3		0.718924	-0.33	0.45	0.04	1.17351	0.16	0.27	0.92	1.63232	0.49	0.39	1	1.04	0.18	0.75	0.2	1.21	0.19
Q9BSW5_HUMAN	2	40S ribosomal protein S2 Fragment OS Homo sapiens GN RPS2 PE 2 SV 1	3864.46		0.740818	-0.3	0.05	0	0.941765	-0.06	0.06	0.05	1.2586	0.23	0.06	1	1.12	0.04	0.83	0.03	1.05	0.04
PTMS_HUMAN	2	Parathymosin OS=Homo sapiens GN=PTMS PE=1 SV=2	6401.65		0.740818	-0.3	0.03	0	0.88692	-0.12	0.03	0	1.19722	0.18	0.04	1	1.14	0.02	0.84	0.02	1.01	0.02
SMD1_HUMAN	2	Small nuclear ribonucleoprotein Sm D1 OS Homo sapiens GN SNRPD1 PE 2 SV 1	4938.53		0.740818	-0.3	0.02	0	1.03045	0.03	0.02	0.99	1.39097	0.33	0.02	1	1.08	0.01	0.8	0.01	1.11	0.01
F5A1_HUMAN	2	Eukaryotic translation initiation factor 5A-1 OS=Homo sapiens GN=EIF5A PE=1 SV=2	6633.37		0.748264	-0.29	0.23	0	0.860708	-0.15	0.22	0.09	1.15027	0.14	0.18	0.87	1.15	0.13	0.86	0.11	0.99	0.11
PIMT_HUMAN	2	Protein-L-isoaspartate(D-aspartate) O-methyltransferase OS=Homo sapiens GN=PCMT1 PE=1 SV=4	13558.9		0.748264	-0.29	0.05	0	1.01005	0.01	0.04	0.69	1.34986	0.3	0.04	1	1.09	0.03	0.81	0.03	1.1	0.02
PHB2_HUMAN	2	Prohibitin 2 OS Homo sapiens GN PHB2 PE 2 SV 1	12092.1		0.755784	-0.28	0.59	0.15	1.06184	0.06	0.47	0.59	1.40495	0.34	0.5	0.91	1.06	0.29	0.81	0.27	1.13	0.33
PROF1_HUMAN	2	Profilin-1 OS=Homo sapiens GN=PFN1 PE=1 SV=2	12302.6		0.771052	-0.26	0.12	0	0.895834	-0.11	0.1	0.03	1.16183	0.15	0.15	0.97	1.13	0.07	0.87	0.07	1.01	0.07
RM12_HUMAN	2	39S ribosomal protein L12, mitochondrial OS=Homo sapiens GN=MRPL12 PE=1 SV=2	7308		0.771052	-0.26	0.07	0	0.960789	-0.04	0.07	0.1	1.24608	0.22	0.07	1	1.1	0.03	0.84	0.04	1.06	0.04
B4DTM7_HUMAN	2	Uncharacterized protein OS Homo sapiens GN VCL PE 2 SV 1	6763.74		0.778801	-0.25	0.12	0	0.951229	-0.05	0.1	0.23	1.2214	0.2	0.12	1	1.1	0.06	0.85	0.06	1.05	0.07
DDX17_HUMAN	2	Probable ATP-dependent RNA helicase DDX17 OS=Homo sapiens GN=DDX17 PE=1 SV=1	4616.16		0.778801	-0.25	0.1	0	0.941765	-0.06	0.07	0.06	1.20925	0.19	0.1	1	1.1	0.05	0.86	0.05	1.04	0.04
RUVB1_HUMAN	2	RuvB-like 1 OS=Homo sapiens GN=RUVBL1 PE=1 SV=1	2632.57		0.786628	-0.24	0.17	0.01	1.06184	0.06	0.14	0.76	1.34986	0.3	0.15	1	1.05	0.1	0.83	0.08	1.12	0.08
D6RF23_HUMAN	2	Guanine nucleotide binding protein subunit beta 2 like 1 OS Homo sapiens GN GNB2L1 PE 2 SV 1	7034.23		0.786628	-0.24	0.06	0	0.923116	-0.08	0.07	0	1.17351	0.16	0.08	1	1.11	0.04	0.87	0.04	1.02	0.04
BCL2_HUMAN	2	Apoptosis regulator Bcl-2 OS=Homo sapiens GN=BCL2 PE=1 SV=2	2826.77		0.794534	-0.23	0.05	0	0.904837	-0.1	0.04	0	1.13883	0.13	0.04	1	1.11	0.03	0.88	0.02	1	0.02
RS17L_HUMAN	2	40S ribosomal protein S17 like OS Homo sapiens GN RPS17L PE 1 SV 1	31844.8		0.794534	-0.23	0.12	0	0.913931	-0.09	0.1	0.06	1.16183	0.15	0.12	0.99	1.11	0.06	0.88	0.07	1.02	0.07
NFM_HUMAN	2	Neurofilament medium polypeptide OS Homo sapiens GN NEFM PE 2 SV 1	9715.34		0.802519	-0.22	0.11	0	0.980199	-0.02	0.09	0.42	1.23368	0.21	0.11	1	1.08	0.05	0.86	0.06	1.06	0.05
Q5SX87_HUMAN	2	Rab GDP dissociation inhibitor beta Fragment OS Homo sapiens GN GDI2 PE 2 SV 1	1001.98		0.810584	-0.21	0.13	0	1	0	0.1	0.5	1.24608	0.22	0.13	1	1.07	0.07	0.86	0.06	1.07	0.07
RS7_HUMAN	2	40S ribosomal protein S7 OS Homo sapiens GN RPS7 PE 1 SV 1	2105.84		0.810584	-0.21	0.13	0	1	0	0.08	0.46	1.23368	0.21	0.11	0.99	1.07	0.05	0.87	0.07	1.07	0.05
I3L3P5_HUMAN	2	Protein disulfide isomerase Fragment OS Homo sapiens GN P4HB PE 2 SV 1	2236.45		0.810584	-0.21	0.12	0	0.913931	-0.09	0.1	0.09	1.11628	0.11	0.11	0.99	1.1	0.06	0.9	0.06	1	0.07
B3KQV6_HUMAN	2	Serine threonine protein phosphatase 2A 65 kDa regulatory subunit A alpha isoform OS Homo sapiens GN	2895.93		0.810584	-0.21	0.11	0	0.941765	-0.06	0.11	0.17	1.16183	0.15	0.13	0.96	1.09	0.06	0.89	0.07	1.03	0.07
E9PBS1_HUMAN	2	Phosphoribosylaminoimidazole carboxylase Fragment OS Homo sapiens GN PAICS PE 2 SV 1	3898.1		0.810584	-0.21	0.07	0	0.895834	-0.11	0.08	0	1.10517	0.1	0.08	0.99	1.11	0.05	0.9	0.03	0.99	0.04
C9JTK6_HUMAN	2	Obg like ATPase 1 Fragment OS Homo sapiens GN OLA1 PE 2 SV 1	4832.47		0.810584	-0.21	0.09	0	1.06184	0.06	0.07	0.91	1.30996	0.27	0.09	1	1.04	0.04	0.85	0.05	1.11	0.05
C9J1Z8_HUMAN	2	ADP ribosylation factor 5 Fragment OS Homo sapiens GN ARF5 PE 2 SV 1	6460.1		0.810584	-0.21	0.08	0	0.878095	-0.13	0.09	0	1.08329	0.08	0.09	0.96	1.11	0.05	0.9	0.05	0.98	0.05
IF4A3_HUMAN	2	Eukaryotic initiation factor 4A III OS Homo sapiens GN EIF4A3 PE 1 SV 4	7569.47		0.810584	-0.21	0.05	0	0.923116	-0.08	0.05	0	1.13883	0.13	0.06	1	1.1	0.03	0.89	0.03	1.01	0.03
RLA1_HUMAN	2	60S acidic ribosomal protein P1 OS Homo sapiens GN RPLP1 PE 1 SV 1	9304.35		0.810584	-0.21	0.04	0	0.904837	-0.1	0.04	0	1.10517	0.1	0.03	1	1.1	0.02	0.9	0.02	1	0.02
M0QZN2_HUMAN	2	40S ribosomal protein S5 OS Homo sapiens GN RPS5 PE 2 SV 1	11372.8		0.810584	-0.21	0.03	0	0.932394	-0.07	0.03	0	1.15027	0.14	0.04	1	1.09	0.02	0.89	0.02	1.02	0.02
Q5T0R7_HUMAN	2	Adenylyl cyclase associated protein Fragment OS Homo sapiens GN CAP1 PE 2 SV 1	2617.17		0.818731	-0.2	0.13	0	1	0	0.1	0.49	1.2214	0.2	0.12	1	1.07	0.07	0.87	0.07	1.06	0.07
A8MUD9_HUMAN	2	60S ribosomal protein L7 OS Homo sapiens GN RPL7 PE 2 SV 1	3253		0.818731	-0.2	0.12	0	1.01005	0.01	0.11	0.53	1.23368	0.21	0.13	1	1.06	0.07	0.87	0.06	1.07	0.08
RAB1A_HUMAN	2	Isoform 2 of Ras related protein Rab 1A OS Homo sapiens GN RAB1A	2592.7		0.818731	-0.2	0.03	0	0.941765	-0.06	0.03	0	1.15027	0.14	0.03	1	1.09	0.02	0.89	0.02	1.02	0.02
EF1G_HUMAN	2	Elongation factor 1 gamma OS Homo sapiens GN EEF1G PE 1 SV 3	3992.22		0.818731	-0.2	0.07	0	0.932394	-0.07	0.06	0.01	1.13883	0.13	0.07	1	1.09	0.04	0.89	0.04	1.02	0.04
CLH1_HUMAN	2	Isoform 2 of Clathrin heavy chain 1 OS Homo sapiens GN CLTC	5443.37		0.818731	-0.2	0.04	0	0.904837	-0.1	0.05	0	1.10517	0.1	0.05	1	1.1	0.03	0.9	0.02	1	0.03
Q5SQT6_HUMAN	2	Inorganic pyrophosphatase OS Homo sapiens GN PPA1 PE 2 SV 1	19107		0.818731	-0.2	0.03	0	0.941765	-0.06	0.03	0	1.15027	0.14	0.03	1	1.09	0.02	0.89	0.02	1.02	0.02
FKB1A_HUMAN	2	Peptidyl prolyl cis trans isomerase FKBP1A OS Homo sapiens GN FKBP1A PE 1 SV 2	2608.13		0.826959	-0.19	0.09	0	1.11628	0.11	0.06	1	1.34986	0.3	0.1	1	1.02	0.04	0.84	0.05	1.14	0.04
XRCC5_HUMAN	2	X ray repair cross complementing protein 5 OS Homo sapiens GN XRCC5 PE 1 SV 3	26710.8		0.826959	-0.19	0.06	0	0.932394	-0.07	0.06	0.01	1.1275	0.12	0.06	1	1.09	0.04	0.9	0.03	1.01	0.04
ACTN4_HUMAN	2	Isoform 3 of Alpha actinin 4 OS Homo sapiens GN ACTN4	2568.94		0.826959	-0.19	0.1	0	0.951229	-0.05	0.09	0.14	1.15027	0.14	0.1	1	1.08	0.06	0.89	0.06	1.03	0.05
PSB1_HUMAN	2	Proteasome subunit beta type 1 OS Homo sapiens GN PSMB1 PE 1 SV 2	3272.81		0.826959	-0.19	0.09	0	0.99005	-0.01	0.14	0.45	1.19722	0.18	0.15	0.99	1.07	0.08	0.88	0.07	1.05	0.1
F6UXX1_HUMAN	2	Heterogeneous nuclear ribonucleoprotein Q Fragment OS Homo sapiens GN SYNCRIP PE 2 SV 1	4434.19		0.826959	-0.19	0.08	0	0.895834	-0.11	0.08	0	1.09417	0.09	0.08	0.98	1.1	0.05	0.91	0.04	0.99	0.05
K7EL50_HUMAN	2	Calreticulin Fragment OS Homo sapiens GN CALR PE 3 SV 1	5574.32		0.826959	-0.19	0.04	0	0.951229	-0.05	0.04	0.02	1.15027	0.14	0.04	1	1.08	0.02	0.89	0.02	1.03	0.03
F8VQ14_HUMAN	2	T complex protein 1 subunit beta OS Homo sapiens GN CCT2 PE 2 SV 1	10103.5		0.826959	-0.19	0.03	0	0.913931	-0.09	0.04	0	1.10517	0.1	0.03	1	1.09	0.02	0.9	0.02	1	0.02
VDAC1_HUMAN	2	Voltage dependent anion selective channel protein 1 OS Homo sapiens GN VDAC1 PE 1 SV 2	10943.6		0.826959	-0.19	0.07	0	0.932394	-0.07	0.07	0.03	1.1275	0.12	0.07	1	1.09	0.04	0.9	0.03	1.01	0.04
TCPH_HUMAN	2	T complex protein 1 subunit eta OS Homo sapiens GN CCT7 PE 1 SV 2	4256.09		0.83527	-0.18	0.1	0	0.980199	-0.02	0.09	0.33	1.17351	0.16	0.11	1	1.07	0.06	0.89	0.06	1.04	0.06
HSP77_HUMAN	2	Putative heat shock 70 kDa protein 7 OS Homo sapiens GN HSPA7 PE 5 SV 2	12869		0.83527	-0.18	0.12	0	1.1853	0.17	0.08	1	1.41907	0.35	0.09	1	0.99	0.06	0.83	0.06	1.18	0.05
B7Z9L0_HUMAN	2	T complex protein 1 subunit delta OS Homo sapiens GN CCT4 PE 2 SV 1	18030.8		0.83527	-0.18	0.08	0	1.0202	0.02	0.08	0.74	1.2214	0.2	0.09	1	1.05	0.05	0.88	0.05	1.07	0.05
ILF2_HUMAN	2	Interleukin enhancer binding factor 2 OS Homo sapiens GN ILF2 PE 1 SV 2	20053.2		0.83527	-0.18	0.07	0	0.970446	-0.03	0.05	0.17	1.16183	0.15	0.07	1	1.07	0.03	0.89	0.04	1.04	0.03
DPY30_HUMAN	2	Protein dpy 30 homolog OS Homo sapiens GN DPY30 PE 1 SV 1	3876.95		0.83527	-0.18	0.08	0	0.932394	-0.07	0.08	0.07	1.11628	0.11	0.09	0.98	1.08	0.04	0.9	0.04	1.01	0.05
B4DI60_HUMAN	2	Plastin 3 OS Homo sapiens GN PLS3 PE 2 SV 1	5965.36		0.83527	-0.18	0.13	0	0.960789	-0.04	0.09	0.23	1.15027	0.14	0.09	1	1.07	0.07	0.89	0.06	1.03	0.04
IMB1_HUMAN	2	Importin subunit beta 1 OS Homo sapiens GN KPNB1 PE 1 SV 2	8737.96		0.83527	-0.18	0.05	0	1.01005	0.01	0.05	0.67	1.20925	0.19	0.05	1	1.05	0.03	0.88	0.02	1.07	0.03
B7Z2F4_HUMAN	2	T complex protein 1 subunit delta OS Homo sapiens GN CCT4 PE 2 SV 1	15923.2		0.83527	-0.18	0.06	0	0.99005	-0.01	0.05	0.31	1.1853	0.17	0.05	1	1.06	0.03	0.89	0.03	1.05	0.03
F5GXD8_HUMAN	2	Stress induced phosphoprotein 1 OS Homo sapiens GN STIP1 PE 2 SV 1	16977.4		0.83527	-0.18	0.04	0	0.980199	-0.02	0.04	0.12	1.17351	0.16	0.03	1	1.07	0.02	0.89	0.02	1.04	0.02
J3QSV6_HUMAN	2	Ribosomal L1 domain containing protein 1 Fragment OS Homo sapiens GN RSL1D1 PE 2 SV 1	30331.2		0.83527	-0.18	0.02	0	0.913931	-0.09	0.02	0	1.09417	0.09	0.03	1	1.09	0.01	0.91	0.01	1	0.01
IPYR_HUMAN	2	Inorganic pyrophosphatase OS Homo sapiens GN PPA1 PE 1 SV 2	1044		0.843665	-0.17	0.13	0	0.99005	-0.01	0.13	0.46	1.1853	0.17	0.15	0.99	1.06	0.07	0.89	0.08	1.05	0.08
K7EPT6_HUMAN	2	TATA binding protein associated factor 2N OS Homo sapiens GN TAF15 PE 2 SV 1	1240.41		0.843665	-0.17	0.09	0	1.09417	0.09	0.11	0.9	1.29693	0.26	0.11	1	1.02	0.05	0.86	0.06	1.12	0.08
S4R3J4_HUMAN	2	Heterogeneous nuclear ribonucleoprotein R OS Homo sapiens GN HNRNPR PE 4 SV 1	4175.73		0.843665	-0.17	0.08	0	0.941765	-0.06	0.09	0.13	1.1275	0.12	0.09	1	1.08	0.05	0.91	0.05	1.02	0.05
C9JL19_HUMAN	2	60 kDa heat shock protein mitochondrial Fragment OS Homo sapiens GN HSPD1 PE 2 SV 1	22773.4		0.843665	-0.17	0.13	0	0.904837	-0.1	0.13	0.05	1.06184	0.06	0.14	0.81	1.09	0.07	0.92	0.08	0.98	0.07
K7EQ48_HUMAN	2	Glucose 6 phosphate isomerase OS Homo sapiens GN GPI PE 2 SV 2	3589.05		0.843665	-0.17	0.04	0	0.970446	-0.03	0.04	0.04	1.15027	0.14	0.04	1	1.07	0.02	0.9	0.02	1.03	0.03
E9PLA6_HUMAN	2	Serpin H1 Fragment OS Homo sapiens GN SERPINH1 PE 2 SV 1	4033.3		0.843665	-0.17	0.07	0	0.980199	-0.02	0.06	0.31	1.16183	0.15	0.07	1	1.06	0.04	0.9	0.04	1.04	0.04
B4DUR8_HUMAN	2	T complex protein 1 subunit gamma OS Homo sapiens GN CCT3 PE 2 SV 1	4616.33		0.843665	-0.17	0.06	0	0.923116	-0.08	0.05	0	1.09417	0.09	0.05	1	1.08	0.03	0.92	0.03	1	0.03
CAP1_HUMAN	2	Adenylyl cyclase associated protein 1 OS Homo sapiens GN CAP1 PE 1 SV 5	4797.44		0.843665	-0.17	0.05	0	0.970446	-0.03	0.04	0.07	1.15027	0.14	0.05	1	1.07	0.03	0.9	0.03	1.03	0.03
GDIB_HUMAN	2	Rab GDP dissociation inhibitor beta OS Homo sapiens GN GDI2 PE 1 SV 2	5203.67		0.843665	-0.17	0.05	0	0.951229	-0.05	0.05	0.04	1.13883	0.13	0.04	1	1.07	0.03	0.9	0.03	1.03	0.03
F5GWF6_HUMAN	2	T complex protein 1 subunit beta OS Homo sapiens GN CCT2 PE 2 SV 2	6203.06		0.843665	-0.17	0.1	0	0.99005	-0.01	0.1	0.42	1.17351	0.16	0.1	0.99	1.06	0.07	0.89	0.05	1.05	0.05
B4DQH4_HUMAN	2	T complex protein 1 subunit theta OS Homo sapiens GN CCT8 PE 2 SV 1	8960.19		0.843665	-0.17	0.03	0	0.718924	-0.33	0.04	0	0.843665	-0.17	0.05	0	1.17	0.02	0.99	0.02	0.84	0.02
TERA_HUMAN	2	Transitional endoplasmic reticulum ATPase OS Homo sapiens GN VCP PE 1 SV 4	10718.5		0.843665	-0.17	0.03	0	0.932394	-0.07	0.02	0	1.10517	0.1	0.03	1	1.08	0.02	0.91	0.02	1.01	0.02
TBB4B_HUMAN	2	Tubulin beta 4B chain OS Homo sapiens GN TUBB4B PE 1 SV 1	1428.56		0.852144	-0.16	0.13	0	1.04081	0.04	0.12	0.72	1.23368	0.21	0.12	1	1.04	0.08	0.88	0.06	1.08	0.07
MDHM_HUMAN	2	Malate dehydrogenase mitochondrial OS Homo sapiens GN MDH2 PE 1 SV 3	2812.09		0.852144	-0.16	0.26	0.13	0.960789	-0.04	0.21	0.36	1.11628	0.11	0.23	0.81	1.07	0.16	0.91	0.14	1.02	0.12
ATPA_HUMAN	2	Isoform 2 of ATP synthase subunit alpha mitochondrial OS Homo sapiens GN ATP5A1	3455.8		0.852144	-0.16	0.11	0.01	0.960789	-0.04	0.11	0.29	1.1275	0.12	0.12	0.96	1.07	0.07	0.91	0.06	1.02	0.07
PUR9_HUMAN	2	Isoform 2 of Bifunctional purine biosynthesis protein PURH OS Homo sapiens GN ATIC	18006.1		0.852144	-0.16	0.12	0.01	0.951229	-0.05	0.11	0.19	1.11628	0.11	0.13	0.96	1.07	0.07	0.91	0.08	1.02	0.06
RS13_HUMAN	2	40S ribosomal protein S13 OS Homo sapiens GN RPS13 PE 1 SV 2	18335.4		0.852144	-0.16	0.08	0	0.913931	-0.09	0.08	0.02	1.07251	0.07	0.1	0.9	1.08	0.05	0.92	0.05	0.99	0.05
A2A3R7_HUMAN	2	40S ribosomal protein S6 OS Homo sapiens GN RPS6 PE 2 SV 1	2498.03		0.852144	-0.16	0.16	0.04	1.05127	0.05	0.17	0.76	1.23368	0.21	0.14	1	1.03	0.1	0.88	0.08	1.09	0.08
F8VTQ5_HUMAN	2	Heterogeneous nuclear ribonucleoprotein A1 Fragment OS Homo sapiens GN HNRNPA1 PE 2 SV 1	3216.9		0.852144	-0.16	0.05	0	0.960789	-0.04	0.04	0.03	1.13883	0.13	0.04	1	1.07	0.03	0.91	0.03	1.03	0.02
EF1B_HUMAN	2	Elongation factor 1 beta OS Homo sapiens GN EEF1B2 PE 1 SV 3	4377.08		0.852144	-0.16	0.21	0.08	0.740818	-0.3	0.21	0	0.869358	-0.14	0.23	0.13	1.16	0.12	0.99	0.12	0.86	0.12
J3QKZ9_HUMAN	2	Eukaryotic initiation factor 4A I Fragment OS Homo sapiens GN EIF4A1 PE 2 SV 1	6484.15		0.852144	-0.16	0.1	0	1.03045	0.03	0.1	0.77	1.20925	0.19	0.09	1	1.04	0.06	0.89	0.05	1.07	0.06
C9JD32_HUMAN	2	60S ribosomal protein L23 Fragment OS Homo sapiens GN RPL23 PE 2 SV 1	10538.2		0.852144	-0.16	0.03	0	0.99005	-0.01	0.03	0.22	1.15027	0.14	0.03	1	1.06	0.02	0.9	0.02	1.04	0.02
KPYM_HUMAN	2	Pyruvate kinase PKM OS Homo sapiens GN PKM PE 1 SV 4	1266.93		0.860708	-0.15	0.09	0	0.970446	-0.03	0.07	0.22	1.1275	0.12	0.05	1	1.06	0.05	0.91	0.04	1.03	0.04
PARP1_HUMAN	2	Poly ADP ribose polymerase 1 OS Homo sapiens GN PARP1 PE 1 SV 4	2813.36		0.860708	-0.15	0.12	0.02	0.923116	-0.08	0.08	0.03	1.06184	0.06	0.1	0.83	1.08	0.06	0.93	0.06	0.99	0.05
F8VRK0_HUMAN	2	Tubulin alpha 1B chain Fragment OS Homo sapiens GN TUBA1B PE 2 SV 1	2900.6		0.860708	-0.15	0.06	0	1.0202	0.02	0.06	0.72	1.1853	0.17	0.06	1	1.04	0.03	0.89	0.04	1.06	0.03
E7EXB4_HUMAN	2	60 kDa heat shock protein mitochondrial Fragment OS Homo sapiens GN HSPD1 PE 2 SV 1	3925.66		0.860708	-0.15	0.11	0	0.970446	-0.03	0.1	0.27	1.1275	0.12	0.12	0.97	1.06	0.06	0.91	0.06	1.03	0.06
G3V2E8_HUMAN	2	Alpha actinin 1 Fragment OS Homo sapiens GN ACTN1 PE 2 SV 1	4945.43		0.860708	-0.15	0.05	0	0.913931	-0.09	0.05	0	1.06184	0.06	0.05	0.97	1.08	0.03	0.93	0.03	0.99	0.03
RL4_HUMAN	2	60S ribosomal protein L4 OS Homo sapiens GN RPL4 PE 1 SV 5	6387.46		0.860708	-0.15	0.09	0.01	0.895834	-0.11	0.09	0.01	1.04081	0.04	0.13	0.78	1.09	0.04	0.93	0.06	0.98	0.07
PTBP1_HUMAN	2	Polypyrimidine tract binding protein 1 OS Homo sapiens GN PTBP1 PE 1 SV 1	17388.8		0.860708	-0.15	0.03	0	0.99005	-0.01	0.03	0.29	1.15027	0.14	0.03	1	1.05	0.02	0.91	0.02	1.04	0.02
A6NH36_HUMAN	2	40S ribosomal protein S4 X isoform OS Homo sapiens GN RPS4X PE 2 SV 1	30543.9		0.860708	-0.15	0.03	0	0.99005	-0.01	0.03	0.17	1.15027	0.14	0.03	1	1.05	0.02	0.91	0.01	1.04	0.02
S4R402_HUMAN	2	Nucleolar and coiled body phosphoprotein 1 OS Homo sapiens GN NOLC1 PE 4 SV 1	32590.7		0.860708	-0.15	0.03	0	0.99005	-0.01	0.02	0.18	1.15027	0.14	0.02	1	1.05	0.02	0.91	0.01	1.04	0.01
D6RA73_HUMAN	2	Stress 70 protein mitochondrial Fragment OS Homo sapiens GN HSPA9 PE 2 SV 1	36332.4		0.860708	-0.15	0.03	0	0.913931	-0.09	0.03	0	1.06184	0.06	0.04	1	1.08	0.02	0.93	0.02	0.99	0.02
F8VXH9_HUMAN	2	Poly rC binding protein 2 Fragment OS Homo sapiens GN PCBP2 PE 2 SV 1	981.1		0.869358	-0.14	0.27	0.16	0.980199	-0.02	0.29	0.41	1.1275	0.12	0.28	0.82	1.05	0.18	0.92	0.14	1.03	0.17
F8VVB9_HUMAN	2	Tubulin alpha 1B chain Fragment OS Homo sapiens GN TUBA1B PE 2 SV 1	1753.99		0.869358	-0.14	0.18	0.07	1.13883	0.13	0.18	0.95	1.30996	0.27	0.19	1	1	0.09	0.87	0.09	1.13	0.1
HSP74_HUMAN	2	Heat shock 70 kDa protein 4 OS Homo sapiens GN HSPA4 PE 1 SV 4	1916.36		0.869358	-0.14	0.2	0.12	1.03045	0.03	0.15	0.66	1.1853	0.17	0.22	0.95	1.04	0.11	0.9	0.13	1.07	0.1
F5H1C3_HUMAN	2	Gamma enolase Fragment OS Homo sapiens GN ENO2 PE 2 SV 1	2203.79		0.869358	-0.14	0.2	0.09	0.970446	-0.03	0.15	0.39	1.1275	0.12	0.19	0.88	1.06	0.11	0.92	0.11	1.03	0.09
Q3B7A4_HUMAN	2	60S acidic ribosomal protein P0 OS Homo sapiens GN RPLP0 PE 2 SV 1	11715		0.869358	-0.14	0.06	0	0.99005	-0.01	0.07	0.4	1.13883	0.13	0.07	1	1.05	0.04	0.91	0.03	1.04	0.04
F5GZT4_HUMAN	2	Heterogeneous nuclear ribonucleoprotein H OS Homo sapiens GN HNRNPH1 PE 2 SV 1	15732		0.869358	-0.14	0.07	0	0.941765	-0.06	0.08	0.07	1.08329	0.08	0.08	0.96	1.07	0.05	0.93	0.04	1	0.04
TAGL2_HUMAN	2	Transgelin 2 OS Homo sapiens GN TAGLN2 PE 1 SV 3	19088.7		0.869358	-0.14	0.15	0.04	1	0	0.11	0.52	1.15027	0.14	0.16	0.96	1.05	0.08	0.91	0.09	1.04	0.08
G3V4M8_HUMAN	2	Heterogeneous nuclear ribonucleoproteins C1 C2 Fragment OS Homo sapiens GN HNRNPC PE 2 SV 1	4225.57		0.869358	-0.14	0.09	0	0.960789	-0.04	0.09	0.24	1.10517	0.1	0.1	0.98	1.06	0.06	0.92	0.06	1.02	0.06
I3L3Q7_HUMAN	2	Complement component 1 Q subcomponent binding protein mitochondrial Fragment OS Homo sapiens GN C	7882.14		0.869358	-0.14	0.06	0	0.960789	-0.04	0.05	0.09	1.10517	0.1	0.06	1	1.06	0.03	0.92	0.04	1.02	0.03
CALR_HUMAN	2	Calreticulin OS Homo sapiens GN CALR PE 1 SV 1	13126		0.869358	-0.14	0.03	0	0.951229	-0.05	0.03	0.01	1.10517	0.1	0.03	1	1.06	0.02	0.92	0.02	1.02	0.02
HNRPF_HUMAN	2	Heterogeneous nuclear ribonucleoprotein F OS Homo sapiens GN HNRNPF PE 1 SV 3	28903.4		0.869358	-0.14	0.03	0	0.913931	-0.09	0.03	0	1.05127	0.05	0.04	1	1.08	0.02	0.94	0.02	0.98	0.02
HNRPU_HUMAN	2	Isoform Short of Heterogeneous nuclear ribonucleoprotein U OS Homo sapiens GN HNRNPU	2581.73		0.878095	-0.13	0.12	0.03	1.08329	0.08	0.12	0.86	1.23368	0.21	0.13	1	1.01	0.07	0.89	0.06	1.1	0.07
UBA1_HUMAN	2	Ubiquitin like modifier activating enzyme 1 OS Homo sapiens GN UBA1 PE 1 SV 3	3825.34		0.878095	-0.13	0.09	0.01	0.980199	-0.02	0.09	0.33	1.11628	0.11	0.1	0.98	1.05	0.05	0.92	0.05	1.03	0.06
Q96HY3_HUMAN	2	CALM1 protein OS Homo sapiens GN CALM2 PE 2 SV 1	5589.73		0.878095	-0.13	0.17	0.08	1.01005	0.01	0.13	0.56	1.16183	0.15	0.17	0.94	1.04	0.09	0.91	0.09	1.05	0.08
EFTU_HUMAN	2	Elongation factor Tu mitochondrial OS Homo sapiens GN TUFM PE 1 SV 2	5634.83		0.878095	-0.13	0.1	0	1	0	0.07	0.53	1.13883	0.13	0.1	1	1.04	0.05	0.91	0.06	1.04	0.05
RS23_HUMAN	2	40S ribosomal protein S23 OS Homo sapiens GN RPS23 PE 1 SV 3	14010.3		0.878095	-0.13	0.28	0.2	0.932394	-0.07	0.37	0.31	1.05127	0.05	0.22	0.67	1.07	0.22	0.94	0.12	0.99	0.16
C1QBP_HUMAN	2	Complement component 1 Q subcomponent binding protein mitochondrial OS Homo sapiens GN C1QBP PE 1 S	4431.88		0.878095	-0.13	0.1	0.01	1.01005	0.01	0.1	0.58	1.15027	0.14	0.11	1	1.04	0.05	0.91	0.06	1.05	0.06
J3QSA3_HUMAN	2	Ubiquitin Fragment OS Homo sapiens GN UBB PE 2 SV 1	8897.78		0.878095	-0.13	0.03	0	0.980199	-0.02	0.04	0.16	1.11628	0.11	0.04	1	1.05	0.02	0.92	0.02	1.03	0.02
M0QX76_HUMAN	2	40S ribosomal protein S16 Fragment OS Homo sapiens GN RPS16 PE 2 SV 1	9936.01		0.878095	-0.13	0.04	0	0.980199	-0.02	0.03	0.17	1.11628	0.11	0.04	1	1.05	0.02	0.92	0.02	1.03	0.02
HNRPM_HUMAN	2	Isoform 2 of Heterogeneous nuclear ribonucleoprotein M OS Homo sapiens GN HNRNPM	14982.1		0.878095	-0.13	0.04	0	1	0	0.03	0.57	1.13883	0.13	0.04	1	1.04	0.02	0.92	0.02	1.04	0.02
ATPB_HUMAN	2	ATP synthase subunit beta mitochondrial OS Homo sapiens GN ATP5B PE 1 SV 3	73645.9		0.878095	-0.13	0.01	0	0.970446	-0.03	0.01	0	1.10517	0.1	0.01	1	1.05	0.01	0.93	0.01	1.02	0.01
H7C2U0_HUMAN	2	T complex protein 1 subunit theta Fragment OS Homo sapiens GN CCT8 PE 4 SV 1	1090.16		0.88692	-0.12	0.11	0.03	0.970446	-0.03	0.13	0.32	1.09417	0.09	0.11	0.92	1.05	0.07	0.93	0.05	1.02	0.07
RL22_HUMAN	2	60S ribosomal protein L22 OS Homo sapiens GN RPL22 PE 1 SV 2	1260.21		0.88692	-0.12	0.21	0.1	1.03045	0.03	0.25	0.6	1.16183	0.15	0.21	0.89	1.03	0.15	0.91	0.08	1.06	0.14
RLA2_HUMAN	2	60S acidic ribosomal protein P2 OS Homo sapiens GN RPLP2 PE 1 SV 1	3579.31		0.88692	-0.12	0.1	0.01	0.970446	-0.03	0.09	0.28	1.10517	0.1	0.09	1	1.05	0.05	0.93	0.06	1.02	0.05
B4E1K7_HUMAN	2	Stomatin like protein 2 mitochondrial OS Homo sapiens GN STOML2 PE 2 SV 1	5361.02		0.88692	-0.12	0.06	0	0.980199	-0.02	0.06	0.29	1.10517	0.1	0.07	1	1.05	0.03	0.93	0.03	1.03	0.04
HNRPQ_HUMAN	2	Isoform 4 of Heterogeneous nuclear ribonucleoprotein Q OS Homo sapiens GN SYNCRIP	23637		0.88692	-0.12	0.06	0	1.01005	0.01	0.05	0.65	1.13883	0.13	0.05	1	1.04	0.03	0.92	0.03	1.05	0.03
G3V555_HUMAN	2	Heterogeneous nuclear ribonucleoproteins C1 C2 Fragment OS Homo sapiens GN HNRNPC PE 2 SV 1	3375.25		0.88692	-0.12	0.08	0.01	0.980199	-0.02	0.1	0.33	1.09417	0.09	0.09	0.97	1.05	0.04	0.93	0.04	1.02	0.06
SERA_HUMAN	2	D 3 phosphoglycerate dehydrogenase OS Homo sapiens GN PHGDH PE 1 SV 4	3664.52		0.88692	-0.12	0.05	0	0.932394	-0.07	0.05	0.01	1.05127	0.05	0.06	0.96	1.06	0.03	0.95	0.03	0.99	0.03
RL7A_HUMAN	2	60S ribosomal protein L7a OS Homo sapiens GN RPL7A PE 1 SV 2	7887.32		0.88692	-0.12	0.03	0	0.913931	-0.09	0.03	0	1.0202	0.02	0.03	0.93	1.07	0.02	0.95	0.02	0.98	0.02
K7EKH5_HUMAN	2	Fructose bisphosphate aldolase C Fragment OS Homo sapiens GN ALDOC PE 2 SV 1	7098.52		0.895834	-0.11	0.07	0	0.99005	-0.01	0.09	0.42	1.10517	0.1	0.07	0.99	1.04	0.05	0.93	0.04	1.03	0.05
C1TC_HUMAN	2	C 1 tetrahydrofolate synthase cytoplasmic OS Homo sapiens GN MTHFD1 PE 1 SV 3	12108.2		0.895834	-0.11	0.07	0	0.970446	-0.03	0.07	0.28	1.09417	0.09	0.06	0.99	1.05	0.04	0.93	0.04	1.02	0.04
B1AHC9_HUMAN	2	X ray repair cross complementing protein 6 OS Homo sapiens GN XRCC6 PE 2 SV 1	5404.69		0.895834	-0.11	0.04	0	0.970446	-0.03	0.05	0.13	1.07251	0.07	0.05	0.99	1.05	0.03	0.94	0.02	1.01	0.03
E9PPU1_HUMAN	2	40S ribosomal protein S3 OS Homo sapiens GN RPS3 PE 2 SV 1	7602.43		0.895834	-0.11	0.05	0	0.99005	-0.01	0.04	0.31	1.10517	0.1	0.05	1	1.04	0.03	0.93	0.03	1.03	0.02
F8VRZ4_HUMAN	2	Tubulin alpha 1A chain Fragment OS Homo sapiens GN TUBA1A PE 2 SV 1	10802.8		0.895834	-0.11	0.05	0	1	0	0.04	0.51	1.11628	0.11	0.04	1	1.04	0.02	0.93	0.03	1.04	0.02
H7C2W9_HUMAN	2	60S ribosomal protein L31 Fragment OS Homo sapiens GN RPL31 PE 4 SV 1	52231.8		0.895834	-0.11	0.01	0	0.980199	-0.02	0.01	0	1.09417	0.09	0.02	1	1.04	0.01	0.94	0.01	1.02	0.01
MAP4_HUMAN	2	Isoform 7 of Microtubule associated protein 4 OS Homo sapiens GN MAP4	935.57		0.904837	-0.1	0.22	0.17	1.0202	0.02	0.26	0.57	1.1275	0.12	0.17	0.87	1.03	0.13	0.93	0.11	1.05	0.13
G3V5X6_HUMAN	2	Heterogeneous nuclear ribonucleoproteins C1 C2 Fragment OS Homo sapiens GN HNRNPC PE 2 SV 1	3217.73		0.904837	-0.1	0.09	0.02	0.960789	-0.04	0.1	0.18	1.05127	0.05	0.09	0.83	1.05	0.05	0.95	0.05	1	0.06
IMA1_HUMAN	2	Importin subunit alpha 1 OS Homo sapiens GN KPNA2 PE 1 SV 1	3380.57		0.904837	-0.1	0.05	0	0.99005	-0.01	0.06	0.45	1.09417	0.09	0.06	0.99	1.03	0.03	0.94	0.03	1.03	0.03
J3QR48_HUMAN	2	Importin subunit beta 1 Fragment OS Homo sapiens GN KPNB1 PE 2 SV 1	3855.18		0.904837	-0.1	0.06	0	0.980199	-0.02	0.06	0.29	1.08329	0.08	0.06	0.99	1.04	0.04	0.94	0.03	1.02	0.04
B7Z7A9_HUMAN	2	Phosphoglycerate kinase OS Homo sapiens GN PGK1 PE 2 SV 1	4267.24		0.904837	-0.1	0.05	0	1	0	0.04	0.54	1.10517	0.1	0.06	1	1.03	0.03	0.93	0.03	1.03	0.03
SRSF7_HUMAN	2	Isoform 3 of Serine arginine rich splicing factor 7 OS Homo sapiens GN SRSF7	13399.8		0.904837	-0.1	0.04	0	0.951229	-0.05	0.04	0.01	1.05127	0.05	0.04	1	1.05	0.03	0.95	0.02	1	0.02
H0YFX9_HUMAN	2	Histone H2A Fragment OS Homo sapiens GN H2AFJ PE 2 SV 1	30059.4		0.904837	-0.1	0.09	0.03	0.980199	-0.02	0.08	0.25	1.07251	0.07	0.09	0.93	1.04	0.05	0.95	0.05	1.02	0.05
B0AZS6_HUMAN	2	14 3 3 protein zeta delta OS Homo sapiens GN YWHAZ PE 2 SV 1	917.83		0.913931	-0.09	0.22	0.2	1.01005	0.01	0.2	0.56	1.11628	0.11	0.19	0.85	1.03	0.11	0.93	0.12	1.04	0.12
H0YLU7_HUMAN	2	Electron transfer flavoprotein subunit alpha mitochondrial Fragment OS Homo sapiens GN ETFA PE 2	1290.5		0.913931	-0.09	0.21	0.2	1	0	0.13	0.54	1.09417	0.09	0.17	0.82	1.03	0.1	0.94	0.11	1.03	0.07
K7EQH4_HUMAN	2	ATP synthase subunit alpha mitochondrial Fragment OS Homo sapiens GN ATP5A1 PE 4 SV 1	2529.68		0.913931	-0.09	0.09	0.03	0.980199	-0.02	0.07	0.32	1.07251	0.07	0.08	0.94	1.04	0.05	0.95	0.05	1.01	0.05
B4DYD8_HUMAN	2	T complex protein 1 subunit epsilon OS Homo sapiens GN CCT5 PE 2 SV 1	2544.53		0.913931	-0.09	0.08	0.02	1.0202	0.02	0.06	0.68	1.11628	0.11	0.07	1	1.02	0.05	0.94	0.04	1.04	0.04
PLSI_HUMAN	2	Plastin 1 OS Homo sapiens GN PLS1 PE 1 SV 2	7659.25		0.913931	-0.09	0.1	0.07	1.09417	0.09	0.09	0.97	1.1853	0.17	0.09	1	1	0.06	0.92	0.06	1.09	0.05
TBA1B_HUMAN	2	Tubulin alpha 1B chain OS Homo sapiens GN TUBA1B PE 1 SV 1	7852.03		0.913931	-0.09	0.09	0.03	1.04081	0.04	0.08	0.85	1.13883	0.13	0.08	1	1.01	0.05	0.93	0.05	1.06	0.04
H0YH81_HUMAN	2	ATP synthase subunit beta Fragment OS Homo sapiens GN ATP5B PE 3 SV 1	19423.8		0.913931	-0.09	0.13	0.1	0.970446	-0.03	0.12	0.32	1.06184	0.06	0.15	0.78	1.04	0.07	0.95	0.07	1.01	0.08
TBA1C_HUMAN	2	Tubulin alpha 1C chain OS Homo sapiens GN TUBA1C PE 1 SV 1	3044.41		0.913931	-0.09	0.04	0	0.99005	-0.01	0.04	0.4	1.09417	0.09	0.03	1	1.03	0.02	0.94	0.02	1.03	0.02
B7Z254_HUMAN	2	Protein disulfide isomerase A6 OS Homo sapiens GN PDIA6 PE 2 SV 1	4904.96		0.913931	-0.09	0.04	0	0.960789	-0.04	0.05	0.09	1.06184	0.06	0.05	0.97	1.04	0.02	0.95	0.02	1.01	0.03
DESM_HUMAN	2	Desmin OS Homo sapiens GN DES PE 1 SV 3	901.06		0.923116	-0.08	0.24	0.24	1.04081	0.04	0.24	0.59	1.1275	0.12	0.23	0.8	1.01	0.13	0.93	0.12	1.05	0.14
EF2_HUMAN	2	Elongation factor 2 OS Homo sapiens GN EEF2 PE 1 SV 4	2560.52		0.923116	-0.08	0.1	0.1	1.03045	0.03	0.1	0.71	1.11628	0.11	0.1	0.99	1.02	0.06	0.94	0.06	1.05	0.06
ROA1_HUMAN	2	Isoform 2 of Heterogeneous nuclear ribonucleoprotein A1 OS Homo sapiens GN HNRNPA1	19787.1		0.923116	-0.08	0.05	0	0.932394	-0.07	0.06	0.01	1.01005	0.01	0.05	0.68	1.05	0.03	0.97	0.03	0.98	0.03
XPO2_HUMAN	2	Isoform 2 of Exportin 2 OS Homo sapiens GN CSE1L	29198.6		0.923116	-0.08	0.1	0.1	1.0202	0.02	0.09	0.63	1.10517	0.1	0.09	0.98	1.02	0.06	0.94	0.05	1.04	0.05
KCRB_HUMAN	2	Creatine kinase B type OS Homo sapiens GN CKB PE 1 SV 1	16622.4		0.923116	-0.08	0.03	0	1.05127	0.05	0.02	1	1.13883	0.13	0.03	1	1.01	0.02	0.93	0.02	1.06	0.01
J3KR87_HUMAN	2	Clathrin heavy chain 2 OS Homo sapiens GN CLTCL1 PE 2 SV 1	28726.5		0.923116	-0.08	0.02	0	1.0202	0.02	0.02	0.95	1.10517	0.1	0.03	1	1.02	0.01	0.94	0.01	1.04	0.01
DHX9_HUMAN	2	Isoform 2 of ATP dependent RNA helicase A OS Homo sapiens GN DHX9	32542.2		0.923116	-0.08	0.01	0	0.960789	-0.04	0.01	0	1.04081	0.04	0.02	1	1.04	0.01	0.96	0.01	1	0.01
B7Z2E6_HUMAN	2	14 3 3 protein zeta delta OS Homo sapiens GN YWHAZ PE 2 SV 1	813.16		0.932394	-0.07	0.19	0.22	1.04081	0.04	0.2	0.67	1.11628	0.11	0.21	0.89	1.01	0.13	0.94	0.11	1.05	0.13
K7ENG2_HUMAN	2	Splicing factor U2AF 65 kDa subunit OS Homo sapiens GN U2AF2 PE 2 SV 1	3004.9		0.932394	-0.07	0.06	0	1.01005	0.01	0.06	0.59	1.08329	0.08	0.06	0.99	1.02	0.04	0.95	0.03	1.03	0.04
PRDX6_HUMAN	2	Peroxiredoxin 6 OS Homo sapiens GN PRDX6 PE 1 SV 3	7812.33		0.932394	-0.07	0.13	0.21	1.01005	0.01	0.12	0.51	1.08329	0.08	0.09	0.94	1.02	0.08	0.95	0.06	1.03	0.06
A8K8G0_HUMAN	2	Hepatoma derived growth factor OS Homo sapiens GN HDGF PE 2 SV 1	12675.2		0.932394	-0.07	0.07	0.06	1.0202	0.02	0.07	0.69	1.09417	0.09	0.07	0.97	1.02	0.04	0.95	0.04	1.03	0.04
SSRP1_HUMAN	2	FACT complex subunit SSRP1 OS Homo sapiens GN SSRP1 PE 1 SV 1	26702.4		0.932394	-0.07	0.05	0	0.818731	-0.2	0.07	0	0.88692	-0.12	0.07	0	1.09	0.03	1.01	0.03	0.9	0.04
GRP75_HUMAN	2	Stress 70 protein mitochondrial OS Homo sapiens GN HSPA9 PE 1 SV 2	2894.81		0.932394	-0.07	0.05	0	1.03045	0.03	0.05	0.82	1.10517	0.1	0.05	1	1.01	0.03	0.94	0.03	1.04	0.03
SAP_HUMAN	2	Prosaposin OS Homo sapiens GN PSAP PE 1 SV 2	5110.38		0.932394	-0.07	0.04	0	0.99005	-0.01	0.04	0.32	1.06184	0.06	0.04	1	1.03	0.02	0.96	0.02	1.02	0.02
E7EPB3_HUMAN	2	60S ribosomal protein L14 OS Homo sapiens GN RPL14 PE 2 SV 1	6178.64		0.932394	-0.07	0.05	0	0.99005	-0.01	0.05	0.39	1.07251	0.07	0.05	1	1.03	0.03	0.95	0.03	1.02	0.03
G5E9G0_HUMAN	2	60S ribosomal protein L3 OS Homo sapiens GN RPL3 PE 2 SV 1	10616.1		0.932394	-0.07	0.03	0	1.0202	0.02	0.02	0.87	1.08329	0.08	0.03	1	1.02	0.02	0.95	0.01	1.03	0.01
DDX3X_HUMAN	2	Isoform 2 of ATP dependent RNA helicase DDX3X OS Homo sapiens GN DDX3X	14658.2		0.932394	-0.07	0.03	0	1.01005	0.01	0.03	0.81	1.08329	0.08	0.03	1	1.02	0.02	0.95	0.02	1.03	0.02
RS28_HUMAN	2	40S ribosomal protein S28 OS Homo sapiens GN RPS28 PE 1 SV 1	15401.5		0.932394	-0.07	0.04	0	0.951229	-0.05	0.04	0.02	1.03045	0.03	0.05	0.86	1.04	0.03	0.97	0.03	0.99	0.02
F8WE65_HUMAN	2	Peptidyl prolyl cis trans isomerase OS Homo sapiens GN PPIA PE 2 SV 1	22102.4		0.932394	-0.07	0.02	0	0.99005	-0.01	0.02	0.15	1.06184	0.06	0.02	1	1.03	0.01	0.96	0.01	1.01	0.01
E9PJD9_HUMAN	2	60S ribosomal protein L27a OS Homo sapiens GN RPL27A PE 2 SV 1	42864.6		0.932394	-0.07	0.02	0	1.0202	0.02	0.02	0.98	1.09417	0.09	0.02	1	1.02	0.01	0.95	0.01	1.03	0.01
H3BM89_HUMAN	2	60S ribosomal protein L4 OS Homo sapiens GN RPL4 PE 2 SV 1	1260.12		0.941765	-0.06	0.08	0.1	1.08329	0.08	0.09	0.95	1.16183	0.15	0.09	1	0.99	0.05	0.93	0.05	1.08	0.05
NSF_HUMAN	2	Vesicle fusing ATPase OS Homo sapiens GN NSF PE 2 SV 1	2012.22		0.941765	-0.06	0.11	0.16	1.05127	0.05	0.1	0.78	1.11628	0.11	0.11	0.97	1	0.06	0.94	0.06	1.05	0.06
DDX17_HUMAN	2	Isoform 2 of Probable ATP dependent RNA helicase DDX17 OS Homo sapiens GN DDX17	6578.81		0.941765	-0.06	0.07	0.04	1.01005	0.01	0.06	0.67	1.08329	0.08	0.06	1	1.02	0.04	0.95	0.04	1.03	0.04
TBA1A_HUMAN	2	Isoform 2 of Tubulin alpha 1A chain OS Homo sapiens GN TUBA1A	18108.5		0.941765	-0.06	0.06	0.03	0.970446	-0.03	0.05	0.13	1.0202	0.02	0.06	0.76	1.03	0.03	0.97	0.03	1	0.03
E7EUT5_HUMAN	2	Glyceraldehyde 3 phosphate dehydrogenase OS Homo sapiens GN GAPDH PE 2 SV 1	2690.86		0.941765	-0.06	0.11	0.13	1.07251	0.07	0.13	0.86	1.13883	0.13	0.1	0.99	1	0.06	0.94	0.05	1.07	0.08
D6R9P3_HUMAN	2	Heterogeneous nuclear ribonucleoprotein A B OS Homo sapiens GN HNRNPAB PE 2 SV 1	3353.09		0.941765	-0.06	0.13	0.18	0.895834	-0.11	0.12	0.06	0.951229	-0.05	0.14	0.19	1.06	0.07	0.99	0.08	0.95	0.07
1433T_HUMAN	2	14 3 3 protein theta OS Homo sapiens GN YWHAQ PE 1 SV 1	5702.06		0.941765	-0.06	0.04	0.01	0.923116	-0.08	0.04	0	0.980199	-0.02	0.05	0.26	1.05	0.02	0.99	0.03	0.97	0.02
RL6_HUMAN	2	60S ribosomal protein L6 OS Homo sapiens GN RPL6 PE 1 SV 3	8507.56		0.941765	-0.06	0.08	0.08	1	0	0.09	0.51	1.07251	0.07	0.1	0.9	1.02	0.05	0.96	0.05	1.02	0.04
1433Z_HUMAN	2	14 3 3 protein zeta delta OS Homo sapiens GN YWHAZ PE 1 SV 1	10883.1		0.941765	-0.06	0.02	0	1.08329	0.08	0.02	1	1.16183	0.15	0.02	1	0.99	0.01	0.93	0.01	1.08	0.02
HNRDL_HUMAN	2	Isoform 3 of Heterogeneous nuclear ribonucleoprotein D like OS Homo sapiens GN HNRNPDL	35288.1		0.941765	-0.06	0.02	0	1.01005	0.01	0.02	0.91	1.07251	0.07	0.02	1	1.02	0.01	0.95	0.01	1.03	0.01
GSTP1_HUMAN	2	Glutathione S transferase P OS Homo sapiens GN GSTP1 PE 1 SV 2	37608.3		0.941765	-0.06	0.03	0	1.0202	0.02	0.02	0.9	1.08329	0.08	0.03	1	1.02	0.01	0.95	0.02	1.03	0.02
H2A1A_HUMAN	2	Histone H2A type 1 A OS Homo sapiens GN HIST1H2AA PE 1 SV 3	41668.4		0.941765	-0.06	0.02	0	1.0202	0.02	0.02	1	1.09417	0.09	0.02	1	1.01	0.01	0.95	0.01	1.04	0.01
RAN_HUMAN	2	GTP binding nuclear protein Ran OS Homo sapiens GN RAN PE 1 SV 3	46555.7		0.941765	-0.06	0.02	0	1.0202	0.02	0.01	0.99	1.09417	0.09	0.02	1	1.01	0.01	0.95	0.01	1.04	0.01
Q86U12_HUMAN	2	Full length cDNA clone CS0CAP007YF18 of Thymus of Homo sapiens human OS Homo sapiens GN HSP90AA1 P	1174.58		0.951229	-0.05	0.13	0.27	0.878095	-0.13	0.14	0.06	0.913931	-0.09	0.14	0.2	1.06	0.07	1.01	0.08	0.93	0.01
RS25_HUMAN	2	40S ribosomal protein S25 OS Homo sapiens GN RPS25 PE 1 SV 1	1321.36		0.951229	-0.05	0.12	0.22	1.05127	0.05	0.11	0.78	1.10517	0.1	0.12	0.94	1	0.08	0.95	0.07	1.05	0.06
VIME_HUMAN	2	Vimentin OS Homo sapiens GN VIM PE 1 SV 4	3242.4		0.951229	-0.05	0.2	0.31	1.04081	0.04	0.26	0.64	1.09417	0.09	0.19	0.8	1	0.14	0.95	0.1	1.04	0.13
K7EM20_HUMAN	2	14 3 3 protein epsilon Fragment OS Homo sapiens GN YWHAE PE 2 SV 1	3770.71		0.951229	-0.05	0.08	0.1	1.07251	0.07	0.08	0.93	1.1275	0.12	0.07	0.99	0.99	0.05	0.94	0.04	1.06	0.05
J3QLN6_HUMAN	2	Eukaryotic initiation factor 4A I Fragment OS Homo sapiens GN EIF4A1 PE 2 SV 1	5741.65		0.951229	-0.05	0.14	0.27	1.0202	0.02	0.12	0.59	1.06184	0.06	0.13	0.8	1.01	0.08	0.96	0.08	1.03	0.04
EIF3B_HUMAN	2	Eukaryotic translation initiation factor 3 subunit B OS Homo sapiens GN EIF3B PE 1 SV 3	6480.23		0.951229	-0.05	0.08	0.1	1.0202	0.02	0.07	0.7	1.07251	0.07	0.07	0.99	1.01	0.04	0.96	0.04	1.03	0.13
B7Z6M1_HUMAN	2	Plastin 3 OS Homo sapiens GN PLS3 PE 2 SV 1	26476.2		0.951229	-0.05	0.07	0.08	1.05127	0.05	0.07	0.91	1.10517	0.1	0.05	1	1	0.04	0.95	0.04	1.05	0.03
EF1A1_HUMAN	2	Elongation factor 1 alpha 1 OS Homo sapiens GN EEF1A1 PE 1 SV 1	6239.07		0.951229	-0.05	0.04	0.02	1.07251	0.07	0.04	1	1.1275	0.12	0.04	1	0.99	0.02	0.94	0.02	1.07	0.01
IF4A1_HUMAN	2	Eukaryotic initiation factor 4A I OS Homo sapiens GN EIF4A1 PE 1 SV 1	1079.76		0.960789	-0.04	0.1	0.22	1.08329	0.08	0.09	0.95	1.11628	0.11	0.09	0.99	0.99	0.06	0.95	0.05	1.06	0.05
RL12_HUMAN	2	60S ribosomal protein L12 OS Homo sapiens GN RPL12 PE 1 SV 1	11870.4		0.960789	-0.04	0.05	0.11	1.05127	0.05	0.04	0.99	1.09417	0.09	0.06	1	0.99	0.03	0.96	0.03	1.05	0.03
NONO_HUMAN	2	Isoform 2 of Non POU domain containing octamer binding protein OS Homo sapiens GN NONO	3153.92		0.960789	-0.04	0.04	0.04	0.970446	-0.03	0.04	0.11	1.0202	0.02	0.03	0.8	1.02	0.02	0.98	0.02	1	0.02
J3KTB5_HUMAN	2	Eukaryotic initiation factor 4A I Fragment OS Homo sapiens GN EIF4A1 PE 2 SV 1	3254.1		0.960789	-0.04	0.09	0.22	1.04081	0.04	0.1	0.78	1.07251	0.07	0.09	0.93	1	0.05	0.96	0.05	1.04	0.06
RS8_HUMAN	2	40S ribosomal protein S8 OS Homo sapiens GN RPS8 PE 1 SV 2	14233.6		0.960789	-0.04	0.03	0.02	1.09417	0.09	0.03	1	1.13883	0.13	0.03	1	0.98	0.02	0.94	0.02	1.08	0.02
1433G_HUMAN	2	14 3 3 protein gamma OS Homo sapiens GN YWHAG PE 1 SV 2	1551.09		0.970446	-0.03	0.13	0.32	0.913931	-0.09	0.12	0.1	0.941765	-0.06	0.1	0.16	1.04	0.08	1.01	0.07	0.95	0.02
CH10_HUMAN	2	10 kDa heat shock protein mitochondrial OS Homo sapiens GN HSPE1 PE 1 SV 2	1802.1		0.970446	-0.03	0.14	0.27	0.960789	-0.04	0.13	0.32	1	0	0.14	0.52	1.02	0.08	0.99	0.08	0.99	0.03
I7HJJ0_HUMAN	2	ADP ATP translocase 3 Fragment OS Homo sapiens GN SLC25A6 PE 2 SV 1	2055.55		0.970446	-0.03	0.08	0.28	0.980199	-0.02	0.08	0.38	1.01005	0.01	0.08	0.6	1.02	0.05	0.99	0.04	1	0.05
TBB1_HUMAN	2	Tubulin beta 1 chain OS Homo sapiens GN TUBB1 PE 1 SV 1	7128.91		0.970446	-0.03	0.11	0.28	1.07251	0.07	0.09	0.93	1.10517	0.1	0.08	1	0.99	0.06	0.96	0.05	1.06	0.05
SET_HUMAN	2	Isoform 2 of Protein SET OS Homo sapiens GN SET	7845.48		0.970446	-0.03	0.09	0.26	0.83527	-0.18	0.08	0	0.860708	-0.15	0.09	0	1.07	0.05	1.04	0.06	0.89	0.03
F5H282_HUMAN	2	T complex protein 1 subunit alpha OS Homo sapiens GN TCP1 PE 2 SV 1	9810.32		0.970446	-0.03	0.12	0.36	0.980199	-0.02	0.11	0.35	1.01005	0.01	0.11	0.58	1.02	0.07	0.99	0.07	1	0.05
M0QY85_HUMAN	2	Tubulin beta 4A chain Fragment OS Homo sapiens GN TUBB4A PE 2 SV 1	2442.66		0.970446	-0.03	0.05	0.11	0.99005	-0.01	0.05	0.23	1.01005	0.01	0.04	0.75	1.01	0.03	0.99	0.02	1	0.03
CH60_HUMAN	2	60 kDa heat shock protein mitochondrial OS Homo sapiens GN HSPD1 PE 1 SV 2	3751.64		0.970446	-0.03	0.05	0.12	1.0202	0.02	0.05	0.69	1.05127	0.05	0.05	0.95	1	0.03	0.97	0.03	1.02	0.03
E5RI99_HUMAN	2	60S ribosomal protein L30 Fragment OS Homo sapiens GN RPL30 PE 2 SV 1	7687.19		0.970446	-0.03	0.06	0.19	1.15027	0.14	0.06	1	1.1853	0.17	0.06	1	0.96	0.03	0.94	0.03	1.1	0.04
GDIA_HUMAN	2	Rab GDP dissociation inhibitor alpha OS Homo sapiens GN GDI1 PE 1 SV 2	10443.3		0.970446	-0.03	0.04	0.09	1.11628	0.11	0.04	1	1.13883	0.13	0.04	1	0.97	0.02	0.95	0.02	1.08	0.02
H3BRU6_HUMAN	2	Poly rC binding protein 2 Fragment OS Homo sapiens GN PCBP2 PE 4 SV 1	10849.9		0.970446	-0.03	0.06	0.11	0.923116	-0.08	0.05	0	0.960789	-0.04	0.05	0.06	1.04	0.03	1	0.03	0.96	0.03
F6XY72_HUMAN	2	Nucleoside diphosphate kinase OS Homo sapiens GN NME1 NME2 PE 3 SV 1	15782.9		0.970446	-0.03	0.04	0.03	1.08329	0.08	0.03	1	1.1275	0.12	0.02	1	0.98	0.02	0.95	0.02	1.07	0.02
E9PLJ3_HUMAN	2	Cofilin 1 Fragment OS Homo sapiens GN CFL1 PE 2 SV 1	911.47		0.980199	-0.02	0.1	0.35	1.05127	0.05	0.08	0.89	1.07251	0.07	0.09	0.91	0.99	0.05	0.97	0.05	1.04	0.05
F5H0T1_HUMAN	2	Stress induced phosphoprotein 1 OS Homo sapiens GN STIP1 PE 2 SV 1	1585.49		0.980199	-0.02	0.14	0.37	1.05127	0.05	0.12	0.7	1.07251	0.07	0.13	0.84	0.99	0.07	0.97	0.08	1.04	0.09
E7EQR4_HUMAN	2	Ezrin OS Homo sapiens GN EZR PE 2 SV 2	7697.38		0.980199	-0.02	0.16	0.41	0.852144	-0.16	0.18	0.05	0.869358	-0.14	0.17	0.07	1.06	0.1	1.04	0.09	0.9	0.09
TPIS_HUMAN	2	Isoform 4 of Triosephosphate isomerase OS Homo sapiens GN TPI1	13125.5		0.980199	-0.02	0.13	0.41	1.03045	0.03	0.11	0.7	1.05127	0.05	0.13	0.72	1	0.06	0.98	0.08	1.03	0.02
ROA2_HUMAN	2	Isoform A2 of Heterogeneous nuclear ribonucleoproteins A2 B1 OS Homo sapiens GN HNRNPA2B1	2876.62		0.980199	-0.02	0.07	0.26	1	0	0.07	0.5	1.0202	0.02	0.08	0.74	1.01	0.04	0.98	0.05	1.01	0.04
AINX_HUMAN	2	Alpha internexin OS Homo sapiens GN INA PE 1 SV 2	3359.09		0.980199	-0.02	0.07	0.32	0.970446	-0.03	0.07	0.24	0.99005	-0.01	0.08	0.49	1.02	0.04	0.99	0.05	0.99	0.04
M0R0K9_HUMAN	2	Transcription intermediary factor 1 beta Fragment OS Homo sapiens GN TRIM28 PE 2 SV 1	7055.75		0.980199	-0.02	0.03	0.16	0.99005	-0.01	0.03	0.22	1	0	0.03	0.59	1.01	0.02	0.99	0.02	1	0.02
ILF3_HUMAN	2	Isoform 5 of Interleukin enhancer binding factor 3 OS Homo sapiens GN ILF3	9037.11		0.980199	-0.02	0.04	0.21	0.951229	-0.05	0.04	0.02	0.980199	-0.02	0.04	0.19	1.02	0.03	1	0.02	0.98	0.08
B4E241_HUMAN	2	Serine arginine rich splicing factor 3 OS Homo sapiens GN SFRS3 PE 2 SV 1	35453.6		0.980199	-0.02	0.03	0.19	1.0202	0.02	0.03	0.89	1.04081	0.04	0.04	0.98	1	0.02	0.98	0.02	1.02	0.02
B8ZZL8_HUMAN	2	10 kDa heat shock protein mitochondrial OS Homo sapiens GN HSPE1 PE 2 SV 1	1267.75		0.99005	-0.01	0.15	0.4	0.869358	-0.14	0.19	0.14	0.88692	-0.12	0.17	0.12	1.05	0.09	1.03	0.09	0.92	0.03
1433E_HUMAN	2	Isoform SV of 14 3 3 protein epsilon OS Homo sapiens GN YWHAE	1822.39		0.99005	-0.01	0.21	0.5	1.06184	0.06	0.17	0.73	1.07251	0.07	0.2	0.79	0.99	0.11	0.97	0.11	1.04	0.02
E9PHT9_HUMAN	2	Annexin OS Homo sapiens GN ANXA5 PE 2 SV 1	6678.01		0.99005	-0.01	0.07	0.39	1.06184	0.06	0.06	0.96	1.07251	0.07	0.07	0.94	0.98	0.04	0.97	0.04	1.04	0.04
B4E022_HUMAN	2	Transketolase OS Homo sapiens GN TKT PE 2 SV 1	20087.5		0.99005	-0.01	0.12	0.51	0.913931	-0.09	0.14	0.12	0.923116	-0.08	0.14	0.17	1.03	0.07	1.03	0.08	0.94	0.08
F2Z388_HUMAN	2	60S ribosomal protein L35 OS Homo sapiens GN RPL35 PE 2 SV 1	2659.95		0.99005	-0.01	0.03	0.23	1.04081	0.04	0.03	0.99	1.05127	0.05	0.03	1	0.99	0.02	0.98	0.02	1.03	0.02
ADT2_HUMAN	2	ADP ATP translocase 2 OS Homo sapiens GN SLC25A5 PE 1 SV 7	2882.72		0.99005	-0.01	0.07	0.38	1.01005	0.01	0.06	0.63	1.0202	0.02	0.06	0.78	1	0.04	0.99	0.04	1.01	0.04
C9J9K3_HUMAN	2	40S ribosomal protein SA Fragment OS Homo sapiens GN RPSA PE 2 SV 1	3956.84		0.99005	-0.01	0.04	0.42	1.07251	0.07	0.04	1	1.07251	0.07	0.04	1	0.98	0.02	0.97	0.02	1.05	0.02
PPIA_HUMAN	2	Peptidyl prolyl cis trans isomerase A OS Homo sapiens GN PPIA PE 1 SV 2	4200.1		0.99005	-0.01	0.09	0.39	0.970446	-0.03	0.09	0.24	0.980199	-0.02	0.08	0.35	1.01	0.05	1	0.05	0.98	0.02
EF1A3_HUMAN	2	Putative elongation factor 1 alpha like 3 OS Homo sapiens GN EEF1A1P5 PE 5 SV 1	6173.17		0.99005	-0.01	0.04	0.36	1.07251	0.07	0.05	1	1.08329	0.08	0.04	1	0.98	0.03	0.97	0.02	1.05	0.01
M0R1V7_HUMAN	2	Ubiquitin 60S ribosomal protein L40 Fragment OS Homo sapiens GN UBA52 PE 2 SV 1	6296.65		0.99005	-0.01	0.04	0.22	1.04081	0.04	0.05	0.96	1.06184	0.06	0.04	1	0.99	0.03	0.98	0.02	1.03	0.02
1433B_HUMAN	2	Isoform Short of 14 3 3 protein beta alpha OS Homo sapiens GN YWHAB	6431.38		0.99005	-0.01	0.09	0.38	1.06184	0.06	0.09	0.87	1.07251	0.07	0.08	0.96	0.98	0.05	0.97	0.05	1.04	0.02
ENOA_HUMAN	2	Alpha enolase OS Homo sapiens GN ENO1 PE 1 SV 2	10016.6		0.99005	-0.01	0.02	0.27	0.99005	-0.01	0.02	0.31	1	0	0.02	0.54	1.01	0.01	1	0.01	1	0.01
A6NIW5_HUMAN	2	Peroxiredoxin 2 isoform CRA a OS Homo sapiens GN PRDX2 PE 2 SV 2	4071.78		1	0	0.07	0.54	1.04081	0.04	0.06	0.83	1.04081	0.04	0.06	0.9	0.99	0.05	0.99	0.04	1.03	0.04
HS90A_HUMAN	2	Heat shock protein HSP 90 alpha OS Homo sapiens GN HSP90AA1 PE 1 SV 5	4817.03		1	0	0.12	0.51	1.0202	0.02	0.14	0.63	1.0202	0.02	0.11	0.65	0.99	0.08	0.99	0.07	1.01	0.01
1433F_HUMAN	2	14 3 3 protein eta OS Homo sapiens GN YWHAH PE 1 SV 4	5344.06		1	0	0.09	0.45	0.786628	-0.24	0.14	0	0.786628	-0.24	0.13	0	1.08	0.06	1.08	0.06	0.85	0.03
NDKB_HUMAN	2	Nucleoside diphosphate kinase B OS Homo sapiens GN NME2 PE 1 SV 1	2737.78		1	0	0.07	0.54	1.08329	0.08	0.07	0.98	1.07251	0.07	0.06	0.99	0.97	0.05	0.98	0.04	1.05	0.04
ENPL_HUMAN	2	Endoplasmin OS Homo sapiens GN HSP90B1 PE 1 SV 1	2938.18		1	0	0.07	0.45	1.09417	0.09	0.06	0.99	1.09417	0.09	0.06	1	0.97	0.04	0.97	0.03	1.06	0.04
G3V4N7_HUMAN	2	Creatine kinase B type Fragment OS Homo sapiens GN CKB PE 2 SV 1	3162.58		1	0	0.06	0.5	1.11628	0.11	0.05	1	1.11628	0.11	0.05	1	0.96	0.03	0.96	0.03	1.08	0.03
NUCL_HUMAN	2	Nucleolin OS Homo sapiens GN NCL PE 1 SV 3	4035.12		1	0	0.04	0.55	1.04081	0.04	0.04	0.95	1.03045	0.03	0.05	0.92	0.99	0.02	0.99	0.02	1.02	0.03
K7EM90_HUMAN	2	Enolase Fragment OS Homo sapiens GN ENO1 PE 2 SV 1	4766.69		1	0	0.09	0.51	1.07251	0.07	0.12	0.9	1.07251	0.07	0.09	0.88	0.98	0.06	0.98	0.05	1.05	0.06
PA2G4_HUMAN	2	Proliferation associated protein 2G4 OS Homo sapiens GN PA2G4 PE 1 SV 3	8078.34		1	0	0.06	0.49	1.1275	0.12	0.05	1	1.1275	0.12	0.06	1	0.96	0.03	0.96	0.04	1.08	0.03
B4DLW8_HUMAN	2	Probable ATP dependent RNA helicase DDX5 OS Homo sapiens GN DDX5 PE 2 SV 1	11603.3		1	0	0.04	0.4	1.08329	0.08	0.04	1	1.09417	0.09	0.04	1	0.97	0.02	0.97	0.02	1.06	0.02
F2Z2G2_HUMAN	2	Elongation factor 1 beta OS Homo sapiens GN EEF1B2 PE 2 SV 1	5284.92		1.01005	0.01	0.16	0.5	1.07251	0.07	0.16	0.84	1.06184	0.06	0.14	0.7	0.98	0.09	0.98	0.09	1.04	0.08
HS90B_HUMAN	2	Heat shock protein HSP 90 beta OS Homo sapiens GN HSP90AB1 PE 1 SV 4	12724.1		1.01005	0.01	0.12	0.56	1	0	0.11	0.46	0.99005	-0.01	0.13	0.45	1	0.07	1.01	0.07	0.99	0.06
A8MW50_HUMAN	2	L lactate dehydrogenase Fragment OS Homo sapiens GN LDHB PE 2 SV 1	4447.88		1.01005	0.01	0.09	0.66	1.10517	0.1	0.09	0.98	1.08329	0.08	0.08	0.97	0.96	0.05	0.98	0.05	1.06	0.03
H0Y400_HUMAN	2	Spliceosome RNA helicase DDX39B Fragment OS Homo sapiens GN DDX39B PE 4 SV 1	6304.81		1.01005	0.01	0.05	0.7	1.10517	0.1	0.04	1	1.08329	0.08	0.05	1	0.96	0.03	0.98	0.03	1.06	0.02
U5S1_HUMAN	2	Isoform 2 of 116 kDa U5 small nuclear ribonucleoprotein component OS Homo sapiens GN EFTUD2	15080		1.01005	0.01	0.05	0.6	1.15027	0.14	0.07	1	1.13883	0.13	0.06	1	0.95	0.04	0.96	0.03	1.09	0.06
NASP_HUMAN	2	Nuclear autoantigenic sperm protein OS Homo sapiens GN NASP PE 1 SV 2	20034		1.01005	0.01	0.04	0.71	0.718924	-0.33	0.04	0	0.71177	-0.34	0.04	0	1.1	0.02	1.11	0.02	0.79	0.06
PCBP1_HUMAN	2	Poly rC binding protein 1 OS Homo sapiens GN PCBP1 PE 1 SV 2	1033.4		1.0202	0.02	0.15	0.63	1.08329	0.08	0.11	0.91	1.06184	0.06	0.13	0.8	0.97	0.09	0.99	0.08	1.05	0.07
SFPQ_HUMAN	2	Splicing factor proline and glutamine rich OS Homo sapiens GN SFPQ PE 1 SV 2	1149.92		1.0202	0.02	0.14	0.66	1	0	0.11	0.55	0.980199	-0.02	0.11	0.36	0.99	0.07	1.01	0.07	0.99	0.06
F5GXY2_HUMAN	2	L lactate dehydrogenase A chain Fragment OS Homo sapiens GN LDHA PE 2 SV 1	3239.61		1.0202	0.02	0.14	0.63	1.04081	0.04	0.12	0.75	1.0202	0.02	0.11	0.65	0.98	0.08	1	0.07	1.02	0.06
PGAM1_HUMAN	2	Phosphoglycerate mutase 1 OS Homo sapiens GN PGAM1 PE 1 SV 2	7566.88		1.0202	0.02	0.17	0.54	0.932394	-0.07	0.14	0.13	0.913931	-0.09	0.16	0.12	1.02	0.09	1.03	0.1	0.95	0.03
J3KRZ1_HUMAN	2	Probable ATP dependent RNA helicase DDX5 Fragment OS Homo sapiens GN DDX5 PE 2 SV 1	8001.8		1.0202	0.02	0.11	0.63	1.15027	0.14	0.13	1	1.1275	0.12	0.1	1	0.95	0.07	0.96	0.06	1.09	0.06
YBOX1_HUMAN	2	Nuclease sensitive element binding protein 1 OS Homo sapiens GN YBX1 PE 1 SV 3	9803.67		1.0202	0.02	0.02	0.98	1.06184	0.06	0.02	1	1.04081	0.04	0.02	1	0.97	0.01	1	0.01	1.03	0.01
D6RF44_HUMAN	2	Heterogeneous nuclear ribonucleoprotein D0 Fragment OS Homo sapiens GN HNRNPD PE 2 SV 1	16118.6		1.0202	0.02	0.02	0.93	1.07251	0.07	0.02	1	1.06184	0.06	0.02	1	0.97	0.01	0.99	0.01	1.05	0.01
STMN1_HUMAN	2	Stathmin OS Homo sapiens GN STMN1 PE 1 SV 3	19246.1		1.0202	0.02	0.05	0.79	0.913931	-0.09	0.04	0	0.895834	-0.11	0.05	0	1.02	0.03	1.04	0.03	0.93	0.06
RS18_HUMAN	2	40S ribosomal protein S18 OS Homo sapiens GN RPS18 PE 1 SV 3	999.95		1.03045	0.03	0.17	0.66	1.0202	0.02	0.16	0.6	0.99005	-0.01	0.17	0.47	0.98	0.09	1.01	0.09	1	0.07
J3QQT2_HUMAN	2	60S ribosomal protein L17 Fragment OS Homo sapiens GN RPL17 PE 2 SV 1	2542.56		1.03045	0.03	0.09	0.74	1.01005	0.01	0.1	0.66	0.980199	-0.02	0.08	0.32	0.99	0.05	1.01	0.04	1	0.05
G3BP1_HUMAN	1	Ras GTPase activating protein binding protein 1 OS Homo sapiens GN G3BP1 PE 1 SV 1	31225.7		1.03045	0.03	0.03	0.97	0.923116	-0.08	0.03	0	0.895834	-0.11	0.03	0	1.02	0.02	1.05	0.02	0.94	0.07
RS4X_HUMAN	2	40S ribosomal protein S4 X isoform OS Homo sapiens GN RPS4X PE 1 SV 2	4022.72		1.03045	0.03	0.03	0.96	1.06184	0.06	0.03	1	1.03045	0.03	0.04	0.92	0.97	0.02	1	0.02	1.03	0.02
A2A2D0_HUMAN	2	Stathmin Fragment OS Homo sapiens GN STMN1 PE 2 SV 1	5724.2		1.03045	0.03	0.04	0.89	1.01005	0.01	0.04	0.67	0.980199	-0.02	0.05	0.2	0.99	0.02	1.01	0.02	1	0.03
E9PH29_HUMAN	2	Thioredoxin dependent peroxide reductase mitochondrial OS Homo sapiens GN PRDX3 PE 2 SV 1	12433		1.03045	0.03	0.02	0.99	1.07251	0.07	0.02	1	1.03045	0.03	0.02	0.99	0.97	0.01	1	0.01	1.03	0.01
H0YBG6_HUMAN	2	Stress 70 protein mitochondrial Fragment OS Homo sapiens GN HSPA9 PE 4 SV 1	13544.3		1.03045	0.03	0.05	0.89	0.99005	-0.01	0.06	0.4	0.960789	-0.04	0.06	0.11	0.99	0.03	1.02	0.03	0.98	0.07
TBB6_HUMAN	2	Tubulin beta 6 chain OS Homo sapiens GN TUBB6 PE 1 SV 1	32711.9		1.03045	0.03	0.02	1	0.980199	-0.02	0.02	0.06	0.951229	-0.05	0.02	0	1	0.01	1.03	0.01	0.98	0.01
H0YA96_HUMAN	2	Heterogeneous nuclear ribonucleoprotein D0 Fragment OS Homo sapiens GN HNRNPD PE 4 SV 1	3696		1.04081	0.04	0.07	0.78	1.13883	0.13	0.06	1	1.10517	0.1	0.06	1	0.94	0.04	0.98	0.04	1.08	0.03
E9PI65_HUMAN	2	Heat shock cognate 71 kDa protein Fragment OS Homo sapiens GN HSPA8 PE 2 SV 1	5313.13		1.04081	0.04	0.09	0.79	1.03045	0.03	0.08	0.75	0.99005	-0.01	0.08	0.37	0.98	0.05	1.02	0.05	1.01	0.03
NACAM_HUMAN	2	Nascent polypeptide associated complex subunit alpha muscle specific form OS Homo sapiens GN NACA P	9000.33		1.04081	0.04	0.08	0.87	0.951229	-0.05	0.07	0.04	0.904837	-0.1	0.08	0.03	1	0.04	1.05	0.04	0.95	0.05
H2AV_HUMAN	2	Isoform 2 of Histone H2A V OS Homo sapiens GN H2AFV	10204		1.04081	0.04	0.13	0.79	1	0	0.1	0.52	0.951229	-0.05	0.12	0.24	0.99	0.06	1.03	0.08	0.98	0.02
AN32B_HUMAN	2	Isoform 2 of Acidic leucine rich nuclear phosphoprotein 32 family member B OS Homo sapiens GN ANP32B	24713.2		1.04081	0.04	0.09	0.81	1.2214	0.2	0.07	1	1.17351	0.16	0.07	1	0.92	0.05	0.96	0.04	1.12	0.04
NFL_HUMAN	2	Neurofilament light polypeptide OS Homo sapiens GN NEFL PE 1 SV 3	7386.82		1.04081	0.04	0.04	0.97	1.0202	0.02	0.04	0.79	0.980199	-0.02	0.04	0.16	0.98	0.02	1.02	0.02	1	0.04
ACON_HUMAN	2	Aconitate hydratase mitochondrial OS Homo sapiens GN ACO2 PE 1 SV 2	9177.82		1.04081	0.04	0.06	0.89	1.17351	0.16	0.05	1	1.11628	0.11	0.06	1	0.93	0.03	0.97	0.03	1.09	0.02
PRDX1_HUMAN	2	Peroxiredoxin 1 OS Homo sapiens GN PRDX1 PE 1 SV 1	10021.6		1.04081	0.04	0.05	0.9	0.941765	-0.06	0.05	0.01	0.904837	-0.1	0.06	0	1	0.03	1.05	0.03	0.95	0.02
SRSF1_HUMAN	2	Isoform ASF 3 of Serine arginine rich splicing factor 1 OS Homo sapiens GN SRSF1	4164.9		1.05127	0.05	0.11	0.82	0.771052	-0.26	0.17	0	0.733447	-0.31	0.17	0	1.07	0.08	1.11	0.07	0.82	0.09
PAIRB_HUMAN	2	Isoform 4 of Plasminogen activator inhibitor 1 RNA binding protein OS Homo sapiens GN SERBP1	8335.26		1.05127	0.05	0.06	0.94	1.04081	0.04	0.05	0.89	0.99005	-0.01	0.04	0.34	0.97	0.03	1.02	0.03	1.01	0.03
TBAL3_HUMAN	2	Isoform 2 of Tubulin alpha chain like 3 OS Homo sapiens GN TUBAL3	12296.2		1.05127	0.05	0.08	0.88	1.10517	0.1	0.06	1	1.06184	0.06	0.06	0.97	0.95	0.04	1	0.05	1.05	0.04
THIO_HUMAN	2	Isoform 2 of Thioredoxin OS Homo sapiens GN TXN	6200.41		1.05127	0.05	0.06	0.93	1.10517	0.1	0.07	0.99	1.05127	0.05	0.06	0.93	0.95	0.04	1	0.04	1.05	0.04
NDKA_HUMAN	2	Nucleoside diphosphate kinase A OS Homo sapiens GN NME1 PE 1 SV 1	15869.9		1.05127	0.05	0.03	1	0.980199	-0.02	0.03	0.16	0.941765	-0.06	0.03	0	0.99	0.02	1.04	0.02	0.97	0.03
C9JZG1_HUMAN	2	Eukaryotic translation initiation factor 3 subunit B Fragment OS Homo sapiens GN EIF3B PE 2 SV 1	3495.68		1.06184	0.06	0.08	0.93	0.99005	-0.01	0.09	0.41	0.932394	-0.07	0.09	0.09	0.98	0.05	1.04	0.05	0.97	0.31
J3QL14_HUMAN	2	V type proton ATPase subunit d 1 Fragment OS Homo sapiens GN ATP6V0D1 PE 4 SV 1	4289.96		1.06184	0.06	0.07	0.98	1.1853	0.17	0.06	1	1.11628	0.11	0.06	1	0.93	0.04	0.98	0.03	1.09	0.03
G5E9R0_HUMAN	2	Actin cytoplasmic 1 OS Homo sapiens GN ACTB PE 3 SV 1	8487.81		1.06184	0.06	0.13	0.77	1.07251	0.07	0.12	0.83	1.01005	0.01	0.13	0.57	0.96	0.07	1.02	0.08	1.03	0.02
H12_HUMAN	2	Histone H1 2 OS Homo sapiens GN HIST1H1C PE 1 SV 2	15042		1.06184	0.06	0.04	1	0.904837	-0.1	0.04	0	0.852144	-0.16	0.03	0	1.01	0.02	1.07	0.02	0.92	0.03
F5GZQ4_HUMAN	2	L lactate dehydrogenase A chain Fragment OS Homo sapiens GN LDHA PE 2 SV 1	1287.41		1.07251	0.07	0.1	0.93	1.07251	0.07	0.08	0.92	1	0	0.11	0.53	0.96	0.05	1.02	0.06	1.02	0.05
HSP7C_HUMAN	2	Isoform 2 of Heat shock cognate 71 kDa protein OS Homo sapiens GN HSPA8	1480.25		1.07251	0.07	0.17	0.91	0.895834	-0.11	0.12	0.05	0.83527	-0.18	0.13	0	1.01	0.07	1.08	0.1	0.9	0.01
H4_HUMAN	2	Histone H4 OS Homo sapiens GN HIST1H4A PE 1 SV 2	14826.6		1.07251	0.07	0.13	0.81	1.17351	0.16	0.14	0.96	1.10517	0.1	0.11	0.94	0.92	0.08	0.99	0.06	1.09	0.01
H7C3T4_HUMAN	2	Peroxiredoxin 4 Fragment OS Homo sapiens GN PRDX4 PE 4 SV 1	13161.8		1.07251	0.07	0.05	0.99	1.13883	0.13	0.05	1	1.06184	0.06	0.05	0.97	0.93	0.02	1	0.03	1.06	0.05
E7EMV2_HUMAN	2	Neurofilament medium polypeptide OS Homo sapiens GN NEFM PE 2 SV 1	17334.4		1.07251	0.07	0.04	1	1.07251	0.07	0.03	1	0.99005	-0.01	0.03	0.36	0.95	0.02	1.03	0.02	1.02	0.03
E9PLF4_HUMAN	2	Heat shock cognate 71 kDa protein Fragment OS Homo sapiens GN HSPA8 PE 2 SV 1	19870.2		1.07251	0.07	0.03	1	1	0	0.03	0.39	0.932394	-0.07	0.03	0	0.98	0.02	1.05	0.02	0.97	0.02
DDX21_HUMAN	2	Nucleolar RNA helicase 2 OS Homo sapiens GN DDX21 PE 1 SV 5	2845.28		1.08329	0.08	0.08	0.94	1.10517	0.1	0.1	0.97	1.03045	0.03	0.08	0.74	0.94	0.05	1.02	0.05	1.04	0.06
HSP71_HUMAN	2	Isoform 2 of Heat shock 70 kDa protein 1A 1B OS Homo sapiens GN HSPA1A	3381.86		1.08329	0.08	0.12	0.87	0.88692	-0.12	0.12	0.05	0.818731	-0.2	0.13	0	1.01	0.06	1.09	0.08	0.9	0.01
ACTG_HUMAN	2	Actin cytoplasmic 2 OS Homo sapiens GN ACTG1 PE 1 SV 1	5091.92		1.08329	0.08	0.06	1	1.06184	0.06	0.07	0.96	0.980199	-0.02	0.06	0.27	0.95	0.04	1.03	0.03	1.01	0.02
RL13_HUMAN	2	Isoform 2 of 60S ribosomal protein L13 OS Homo sapiens GN RPL13	16015.6		1.08329	0.08	0.04	1	0.923116	-0.08	0.04	0	0.852144	-0.16	0.04	0	1	0.02	1.08	0.02	0.92	0.06
LDHB_HUMAN	2	L lactate dehydrogenase B chain OS Homo sapiens GN LDHB PE 1 SV 2	17334.4		1.08329	0.08	0.03	1	1.06184	0.06	0.03	1	0.99005	-0.01	0.03	0.2	0.95	0.01	1.03	0.02	1.02	0.02
LDHA_HUMAN	2	Isoform 4 of L lactate dehydrogenase A chain OS Homo sapiens GN LDHA	20608.1		1.08329	0.08	0.03	1	0.980199	-0.02	0.04	0.11	0.904837	-0.1	0.03	0	0.98	0.02	1.06	0.02	0.96	0.02
H7BY16_HUMAN	2	Nucleolin Fragment OS Homo sapiens GN NCL PE 2 SV 1	12330.4		1.09417	0.09	0.04	1	1.05127	0.05	0.04	0.99	0.960789	-0.04	0.04	0.04	0.96	0.02	1.04	0.02	1	0.02
PRDX2_HUMAN	2	Peroxiredoxin 2 OS Homo sapiens GN PRDX2 PE 1 SV 5	24687		1.09417	0.09	0.07	1	1.11628	0.11	0.06	1	1.0202	0.02	0.06	0.75	0.93	0.04	1.02	0.03	1.04	0.04
B8ZZQ6_HUMAN	2	Thymosin alpha 1 OS Homo sapiens GN PTMA PE 2 SV 1	3609.51		1.09417	0.09	0.06	0.99	1	0	0.05	0.52	0.913931	-0.09	0.06	0	0.97	0.03	1.06	0.04	0.97	0.04
MIF_HUMAN	2	Macrophage migration inhibitory factor OS Homo sapiens GN MIF PE 1 SV 4	8701.41		1.09417	0.09	0.04	1	0.99005	-0.01	0.05	0.41	0.904837	-0.1	0.04	0	0.97	0.02	1.06	0.02	0.97	0.04
GRP78_HUMAN	2	78 kDa glucose regulated protein OS Homo sapiens GN HSPA5 PE 1 SV 2	8992.11		1.09417	0.09	0.05	0.99	0.960789	-0.04	0.06	0.07	0.878095	-0.13	0.05	0	0.98	0.03	1.07	0.03	0.94	0.02
PDIA1_HUMAN	2	Protein disulfide isomerase OS Homo sapiens GN P4HB PE 1 SV 3	13211		1.09417	0.09	0.06	1	1.01005	0.01	0.05	0.73	0.923116	-0.08	0.05	0	0.97	0.03	1.05	0.03	0.98	0.07
V9GYF8_HUMAN	2	Rab GDP dissociation inhibitor beta Fragment OS Homo sapiens GN GDI2 PE 4 SV 1	7477.48		1.10517	0.1	0.1	0.96	1.05127	0.05	0.08	0.84	0.951229	-0.05	0.09	0.15	0.95	0.05	1.05	0.07	1	0.04
RL29_HUMAN	2	60S ribosomal protein L29 OS Homo sapiens GN RPL29 PE 1 SV 2	5534.98		1.10517	0.1	0.06	1	1	0	0.07	0.47	0.895834	-0.11	0.08	0	0.97	0.04	1.07	0.04	0.96	0.09
K7EMV3_HUMAN	2	Histone H3 OS Homo sapiens GN H3F3B PE 2 SV 1	12550.7		1.10517	0.1	0.03	1	1.01005	0.01	0.04	0.66	0.913931	-0.09	0.03	0	0.96	0.02	1.06	0.02	0.97	0.02
RL27_HUMAN	2	60S ribosomal protein L27 OS Homo sapiens GN RPL27 PE 1 SV 2	22597.8		1.10517	0.1	0.03	1	1.17351	0.16	0.03	1	1.06184	0.06	0.03	1	0.92	0.02	1.01	0.02	1.07	0.02
K7EK07_HUMAN	2	Histone H3 Fragment OS Homo sapiens GN H3F3B PE 2 SV 1	24002.7		1.10517	0.1	0.03	1	0.970446	-0.03	0.04	0.06	0.878095	-0.13	0.03	0	0.98	0.02	1.08	0.02	0.95	0.02
P00330	2	ALCOHOL DEHYDROGENASE I EC 1 1 1 1	5296.19		1.11628	0.11	0.05	1	1.0202	0.02	0.05	0.72	0.913931	-0.09	0.05	0	0.96	0.03	1.07	0.03	0.98	0.03
SODM_HUMAN	1	Superoxide dismutase Mn mitochondrial Fragment OS Homo sapiens GN SOD2 PE 2 SV 1	12158.6		1.11628	0.11	0.03	1	1.04081	0.04	0.03	0.97	0.932394	-0.07	0.03	0	0.95	0.02	1.06	0.02	0.99	0.08
M0R3H0_HUMAN	2	40S ribosomal protein S16 OS Homo sapiens GN RPS16 PE 2 SV 1	5410.67		1.1275	0.12	0.05	1	1.23368	0.21	0.05	1	1.09417	0.09	0.04	1	0.89	0.02	1.01	0.02	1.1
RUXE_HUMAN	2	Small nuclear ribonucleoprotein E OS Homo sapiens GN SNRPE PE 1 SV 1	6423.8		1.13883	0.13	0.11	0.99	1.05127	0.05	0.1	0.84	0.923116	-0.08	0.1	0.09	0.94	0.06	1.07	0.05	0.99	0.52
H0YIC4_HUMAN	2	Citrate synthase Fragment OS Homo sapiens GN CS PE 2 SV 1	6816.09		1.13883	0.13	0.11	1	0.960789	-0.04	0.14	0.28	0.852144	-0.16	0.11	0	0.97	0.07	1.1	0.07	0.93	0.07
D6RB09_HUMAN	2	40S ribosomal protein S3a Fragment OS Homo sapiens GN RPS3A PE 2 SV 1	8918.48		1.13883	0.13	0.07	1	1.06184	0.06	0.07	0.96	0.932394	-0.07	0.06	0.01	0.94	0.04	1.07	0.04	0.99	0.41
RS27_HUMAN	2	40S ribosomal protein S27 OS Homo sapiens GN RPS27 PE 1 SV 3	2732.04		1.13883	0.13	0.42	0.72	0.913931	-0.09	0.45	0.33	0.802519	-0.22	0.4	0.17	0.98	0.26	1.12	0.22	0.9
S4R2Y4_HUMAN	2	Chromobox protein homolog 3 Fragment OS Homo sapiens GN CBX3 PE 4 SV 1	7667.79		1.13883	0.13	0.04	1	1.19722	0.18	0.04	1	1.05127	0.05	0.03	0.98	0.9	0.02	1.02	0.02	1.08	0.02
G3V203_HUMAN	2	60S ribosomal protein L18 OS Homo sapiens GN RPL18 PE 2 SV 1	3396.3		1.15027	0.14	0.07	1	0.980199	-0.02	0.06	0.31	0.860708	-0.15	0.06	0	0.96	0.04	1.1	0.04	0.94	0.4
F5H335_HUMAN	2	Eukaryotic translation initiation factor 3 subunit A OS Homo sapiens GN EIF3A PE 2 SV 1	3534.01		1.15027	0.14	0.09	1	1.2214	0.2	0.1	1	1.06184	0.06	0.06	0.96	0.89	0.05	1.02	0.04	1.09	0.04
M0R0P7_HUMAN	2	60S ribosomal protein L18a OS Homo sapiens GN RPL18A PE 2 SV 1	13096.1		1.15027	0.14	0.03	1	1.01005	0.01	0.02	0.82	0.878095	-0.13	0.03	0	0.95	0.01	1.09	0.02	0.96
M0QXW7_HUMAN	2	Far upstream element binding protein 2 Fragment OS Homo sapiens GN KHSRP PE 2 SV 1	39823.1		1.15027	0.14	0.02	1	0.951229	-0.05	0.02	0	0.818731	-0.2	0.02	0	0.97	0.01	1.12	0.01	0.92	0.01
M0R0I5_HUMAN	2	Far upstream element binding protein 2 Fragment OS Homo sapiens GN KHSRP PE 4 SV 1	13650.7		1.16183	0.15	0.15	0.97	1.2214	0.2	0.14	0.96	1.05127	0.05	0.16	0.72	0.89	0.08	1.03	0.09	1.08	0.1
B4DY72_HUMAN	2	Heat shock protein 105 kDa OS Homo sapiens GN HSPH1 PE 2 SV 1	3203.7		1.16183	0.15	0.06	1	1.05127	0.05	0.07	0.94	0.904837	-0.1	0.07	0	0.93	0.03	1.09	0.03	0.98	0.04
G3V2J8_HUMAN	2	Heat shock protein HSP 90 alpha Fragment OS Homo sapiens GN HSP90AA1 PE 2 SV 1	8526.34		1.16183	0.15	0.05	1	1.07251	0.07	0.05	1	0.923116	-0.08	0.05	0.01	0.93	0.03	1.08	0.03	1	0.03
HNRH3_HUMAN	2	Isoform 3 of Heterogeneous nuclear ribonucleoprotein H3 OS Homo sapiens GN HNRNPH3	7751.51		1.17351	0.16	0.08	1	1.04081	0.04	0.07	0.85	0.88692	-0.12	0.08	0	0.93	0.04	1.09	0.05	0.97	0.05
EF1A2_HUMAN	2	Elongation factor 1 alpha 2 OS Homo sapiens GN EEF1A2 PE 1 SV 1	4725.4		1.17351	0.16	0.05	1	1.19722	0.18	0.05	1	1.0202	0.02	0.04	0.74	0.89	0.03	1.05	0.03	1.06	0.02
IF2B1_HUMAN	2	Insulin like growth factor 2 mRNA binding protein 1 OS Homo sapiens GN IGF2BP1 PE 1 SV 2	12614.9		1.17351	0.16	0.03	1	0.951229	-0.05	0.04	0.01	0.810584	-0.21	0.03	0	0.96	0.02	1.13	0.02	0.91	0.02
LAP2A_HUMAN	2	Lamina associated polypeptide 2 isoform alpha OS Homo sapiens GN TMPO PE 1 SV 2	6815.27		1.1853	0.17	0.06	1	1.10517	0.1	0.07	1	0.932394	-0.07	0.05	0.01	0.91	0.04	1.08	0.03	1.01	0.04
PGRC1_HUMAN	2	Membrane associated progesterone receptor component 1 OS Homo sapiens GN PGRMC1 PE 1 SV 3	10421.4		1.1853	0.17	0.08	1	1.09417	0.09	0.09	0.97	0.913931	-0.09	0.09	0.04	0.92	0.05	1.09	0.05	1	0.05
HS105_HUMAN	2	Isoform Beta of Heat shock protein 105 kDa OS Homo sapiens GN HSPH1	2579.04		1.1853	0.17	0.11	1	1.15027	0.14	0.11	0.98	0.960789	-0.04	0.12	0.28	0.9	0.05	1.07	0.07	1.03	0.08
LRC59_HUMAN	2	Leucine rich repeat containing protein 59 OS Homo sapiens GN LRRC59 PE 1 SV 1	13836.6		1.1853	0.17	0.03	1	0.970446	-0.03	0.03	0.02	0.818731	-0.2	0.03	0	0.95	0.02	1.12	0.02	0.92	0.02
PRDX1_HUMAN	2	Peroxiredoxin-1 OS=Homo sapiens GN=PRDX1 PE=1 SV=1	3873.38		1.20925	0.19	0.12	1	0.941765	-0.06	0.1	0.14	0.778801	-0.25	0.09	0	0.95	0.06	1.15	0.07	0.9	0.06
PDIA3_HUMAN	2	Protein disulfide-isomerase A3 OS=Homo sapiens GN=PDIA3 PE=1 SV=4	6211.23		1.23368	0.21	0.12	1	0.932394	-0.07	0.1	0.13	0.755784	-0.28	0.11	0	0.95	0.07	1.17	0.08	0.89	0.05
NPM_HUMAN	2	Isoform 2 of Nucleophosmin OS Homo sapiens GN NPM1	3245.53		1.23368	0.21	0.03	1	1.09417	0.09	0.04	1	0.895834	-0.11	0.04	0	0.9	0.02	1.11	0.02	0.99	0.02
DDIT4_HUMAN	2	DNA damage-inducible transcript 4 protein OS=Homo sapiens GN=DDIT4 PE=1 SV=1	3625.28		1.23368	0.21	0.13	1	1.1275	0.12	0.11	0.97	0.923116	-0.08	0.13	0.11	0.89	0.06	1.1	0.08	1.01	0.08
P53_HUMAN	2	Cellular tumor antigen p53 OS=Homo sapiens GN=TP53 PE=1 SV=4	10203.5		1.23368	0.21	0.03	1	1.07251	0.07	0.03	1	0.878095	-0.13	0.02	0	0.91	0.02	1.12	0.02	0.98	0.01
PRDX3_HUMAN	2	Thioredoxin-dependent peroxide reductase, mitochondrial OS=Homo sapiens GN=PRDX3 PE=1 SV=3	17140.7		1.24608	0.22	0.19	0.99	1.06184	0.06	0.17	0.75	0.852144	-0.16	0.15	0.01	0.9	0.1	1.13	0.11	0.96	0.09
GRP78_HUMAN	2	78 kDa glucose-regulated protein OS=Homo sapiens GN=HSPA5 PE=1 SV=2	5971.67		1.2586	0.23	0.12	1	0.941765	-0.06	0.14	0.2	0.748264	-0.29	0.12	0	0.94	0.07	1.18	0.07	0.88	0.08
H33_HUMAN	2	Histone H3.3 OS=Homo sapiens GN=H3F3A PE=1 SV=2	3605.17		1.2586	0.23	0.04	1	1.06184	0.06	0.05	1	0.843665	-0.17	0.04	0	0.9	0.03	1.13	0.02	0.96	0.03
HSP76_HUMAN	2	Heat shock 70 kDa protein 6 OS=Homo sapiens GN=HSPA6 PE=1 SV=2	25232.7		1.27125	0.24	0.13	1	1.17351	0.16	0.13	0.97	0.923116	-0.08	0.13	0.13	0.87	0.07	1.11	0.08	1.02	0.08
KPYM_HUMAN	1	Pyruvate kinase isozymes M1/M2 OS=Homo sapiens GN=PKM2 PE=1 SV=4	25871.8		1.27125	0.24	0.03	1	0.970446	-0.03	0.04	0.04	0.763379	-0.27	0.04	0	0.93	0.02	1.18	0.02	0.9	0.02
NOS2_HUMAN	2	Nitric oxide synthase, inducible OS=Homo sapiens GN=NOS2 PE=1 SV=2	2691.58		1.27125	0.24	0.07	1	1.15027	0.14	0.07	1	0.904837	-0.1	0.07	0.01	0.88	0.04	1.11	0.04	1.01	0.05
H90B4_HUMAN	2	Putative heat shock protein HSP 90 beta 4 OS Homo sapiens GN HSP90AB4P PE 5 SV 1	21569.2		1.29693	0.26	0.03	1	1.06184	0.06	0.04	1	0.810584	-0.21	0.03	0	0.89	0.02	1.16	0.02	0.94	0.02
IMMT_HUMAN	2	Mitochondrial inner membrane protein OS=Homo sapiens GN=IMMT PE=1 SV=1	22420		1.29693	0.26	0.03	1	1.06184	0.06	0.03	1	0.818731	-0.2	0.03	0	0.89	0.02	1.16	0.02	0.95	0.02
TNR1A_HUMAN	2	Tumor necrosis factor receptor superfamily member 1A OS=Homo sapiens GN=TNFRSF1A PE=1 SV=1	6200.33		1.30996	0.27	0.06	1	1.04081	0.04	0.05	0.93	0.794534	-0.23	0.05	0	0.9	0.03	1.17	0.04	0.93	0.03
ANXA5_HUMAN	2	Annexin A5 OS=Homo sapiens GN=ANXA5 PE=1 SV=2	2484.62		1.32313	0.28	0.08	1	1.46228	0.38	0.08	1	1.10517	0.1	0.08	1	0.79	0.04	1.05	0.05	1.16	0.05
MIF_HUMAN	1	Macrophage migration inhibitory factor OS Homo sapiens GN MIF PE 1 SV 4	2105.57		1.37713	0.32	0.04	1	1.01005	0.01	0.04	0.61	0.726149	-0.32	0.05	0	0.89	0.02	1.22	0.03	0.89	0.03
BAX_HUMAN	2	Apoptosis regulator BAX OS=Homo sapiens GN=BAX PE=1 SV=1	13792.8		1.39097	0.33	0.08	1	1.13883	0.13	0.08	1	0.818731	-0.2	0.07	0	0.85	0.04	1.18	0.04	0.97	0.04
SYUA_HUMAN	2	Alpha-synuclein OS=Homo sapiens GN=SNCA PE=1 SV=1	26352		1.40495	0.34	0.03	1	1.08329	0.08	0.03	1	0.771052	-0.26	0.03	0	0.86	0.02	1.21	0.02	0.93	0.02
MARCS_HUMAN	2	Myristoylated alanine rich C kinase substrate OS Homo sapiens GN MARCKS PE 1 SV 4	17102.8		1.40495	0.34	0.12	1	1.28403	0.25	0.12	1	0.913931	-0.09	0.09	0.03	0.81	0.06	1.14	0.05	1.04	0.06
HMGN1_HUMAN	2	Non-histone chromosomal protein HMG-14 OS=Homo sapiens GN=HMGN1 PE=1 SV=3	17221.1		1.41907	0.35	0.07	1	1.08329	0.08	0.08	0.95	0.771052	-0.26	0.07	0	0.86	0.04	1.21	0.04	0.93	0.04
LMNA_HUMAN	2	Prelamin-A/C OS=Homo sapiens GN=LMNA PE=1 SV=1	17102.8		1.44773	0.37	0.1	1	1.13883	0.13	0.14	0.95	0.786628	-0.24	0.12	0	0.84	0.06	1.21	0.07	0.95	0.08
RL29_HUMAN	1	60S ribosomal protein L29 OS Homo sapiens GN RPL29 PE 1 SV 2	2272.49		1.50682	0.41	0.14	1	1.49182	0.4	0.16	1	0.99005	-0.01	0.12	0.41	0.75	0.08	1.13	0.08	1.12	0.08
FSCN1_HUMAN	2	Fascin OS=Homo sapiens GN=FSCN1 PE=1 SV=3	21346		1.52196	0.42	0.09	1	1.47698	0.39	0.09	1	0.980199	-0.02	0.07	0.19	0.75	0.05	1.14	0.04	1.11	0.05
PGK2_HUMAN	2	Phosphoglycerate kinase 2 OS Homo sapiens GN PGK2 PE 1 SV 3	22163.6		2.36316	0.86	0.03	1	1.30996	0.27	0.04	1	0.554327	-0.59	0.03	0	0.64	0.02	1.52	0.02	0.84	0.02
ALDOA_HUMAN	2	Fructose-bisphosphate aldolase A OS=Homo sapiens GN=ALDOA PE=1 SV=2	42421.9		2.43513	0.89	0.03	1	1.39097	0.33	0.03	1	0.571209	-0.56	0.02	0	0.62	0.01	1.52	0.01	0.87	0.01
ENOA_HUMAN	2	Alpha-enolase OS=Homo sapiens GN=ENO1 PE=1 SV=2	62374.7		2.48432	0.91	0.02	1	1.40495	0.34	0.02	1	0.565525	-0.57	0.02	0	0.61	0.01	1.52	0.01	0.86	0.01
TNFA_HUMAN	2	Tumor necrosis factor OS=Homo sapiens GN=TNF PE=1 SV=1	55149		2.55998	0.94	0.02	1	1.36343	0.31	0.02	1	0.532592	-0.63	0.02	0	0.61	0.01	1.56	0.01	0.83	0.01
ZN582_HUMAN	2	Zinc finger protein 582 OS=Homo sapiens GN=ZNF582 PE=2 SV=1	3629.57		4.1787	1.43	0.05	1	1.41907	0.35	0.06	1	0.343008	-1.07	0.03	0	0.45	0.02	1.9	0.02	0.65	0.02
AAAT_HUMAN	1	Isoform 3 of Neutral amino acid transporter B 0 OS Homo sapiens GN SLC1A5	2319.59	Dopamine-T100	Dopamine-T100	Dopamine-T100	Dopamine-T100	Dopamine-T100					Dopamine-T100	Dopamine-T100	Dopamine-T100	Dopamine-T100
B8ZZ51_HUMAN	2	Malate dehydrogenase cytoplasmic OS Homo sapiens GN MDH1 PE 2 SV 1	4667.42	Dopamine-T100	Dopamine-T100	Dopamine-T100	Dopamine-T100	Dopamine-T100					Dopamine-T100	Dopamine-T100	Dopamine-T100	Dopamine-T100
G3V576_HUMAN	2	Heterogeneous nuclear ribonucleoproteins C1 C2 OS Homo sapiens GN HNRNPC PE 2 SV 1	16727.7	Dopamine-T100	Dopamine-T100	Dopamine-T100	Dopamine-T100	Dopamine-T100					Dopamine-T100	Dopamine-T100	Dopamine-T100	Dopamine-T100
RD23B_HUMAN	2	Isoform 2 of UV excision repair protein RAD23 homolog B OS Homo sapiens GN RAD23B	3679.43	GSH-DOPAMINE					GSH-DOPAMINE	GSH-DOPAMINE	GSH-DOPAMINE	GSH-DOPAMINE	GSH-DOPAMINE	GSH-DOPAMINE	GSH-DOPAMINE	GSH-DOPAMINE
TXND5_HUMAN	2	Isoform 2 of Thioredoxin domain containing protein 5 OS Homo sapiens GN TXNDC5	3862.99	GSH-DOPAMINE					GSH-DOPAMINE	GSH-DOPAMINE	GSH-DOPAMINE	GSH-DOPAMINE	GSH-DOPAMINE	GSH-DOPAMINE	GSH-DOPAMINE	GSH-DOPAMINE
H31_HUMAN	2	Histone H3 1 OS Homo sapiens GN HIST1H3A PE 1 SV 2	16936.6	GSH-DOPAMINE					GSH-DOPAMINE	GSH-DOPAMINE	GSH-DOPAMINE	GSH-DOPAMINE	GSH-DOPAMINE	GSH-DOPAMINE	GSH-DOPAMINE	GSH-DOPAMINE
