# Supplementary material for: Selective neuronal targeting, protection and signaling network analysis via dopamine-mediated mesoporous silica nanoparticles
Source: Royal Society of Chemistry journal article supplement (doi:10.1039/c5md00038f), 2015-01-01
Supplement: c5md00038f2.xlsx [file c5md00038f2.xlsx]

## Sheet: DA treatment
GOTerm	Associated Genes Found	All Associated Genes	Nr. Genes	Number of genes grouped	Term PValue	Term PValue Corrected with Bonferroni step down
Alzheimers Disease	[SNCA, TNF, TNFRSF1A, TP53]	ADAM10, ADAM17, APAF1, APBB1, APH1A, APOE, APP, ATF6, ATP2A1, ATP2A2, ATP2A3, BACE1, BAD, BID, CACNA1C, CACNA1D, CACNA1F, CACNA1S, CALM1, CALM2, CALM3, CALML3, CALML5, CAPN1, CAPN2, CASP12, CASP3, CASP7, CASP8, CASP9, CDK5, CDK5R1, CHP1, CHP2, CYCS, EIF2AK3, ERN1, FADD, FAS, GAPDH, GNAQ, GRIN1, GRIN2A, GRIN2B, GRIN2C, GRIN2D, GSK3B, HSD17B10, IDE, IL1B, ITPR1, ITPR2, ITPR3, LPL, LRP1, MAPK1, MAPK…	4	5	6.2653e-05	0.00382183
Amyotrophic lateral sclerosis (ALS)	[BAX, BCL2, NEFM, TNF, TNFRSF1A, TP53]	[ALS2, APAF1, BAD, BAX, BCL2, BCL2L1, BID, CASP1, CASP12, CASP3, CASP9, CAT, CCS, CYCS, DAXX, DERL1, GPX1, GRIA1, GRIA2, GRIN1, GRIN2A, GRIN2B, GRIN2C, GRIN2D, MAP2K3, MAP2K6, MAP3K5, MAPK11, MAPK12, MAPK13, MAPK14, NEFH, NEFL, NEFM, NOS1, PPP3CA, PPP3CB, PPP3CC, PPP3R1, PPP3R2, PRPH, RAB5A, RAC1, SLC1A2, SOD1, TNF, TNFRSF1A, TNFRSF1B, TOMM40, TOMM40L, TP53]	6	10	3.87541e-09	3.17784e-07
Antigen processing and presentation	[HSPA5, HSPA6, PDIA3, TNF]	[B2M, CALR, CANX, CD4, CD74, CD8A, CD8B, CIITA, CREB1, CTSB, CTSL, CTSS, HLA-A, HLA-B, HLA-C, HLA-DMA, HLA-DMB, HLA-DOA, HLA-DOB, HLA-DPA1, HLA-DPB1, HLA-DQA1, HLA-DQA2, HLA-DQB1, HLA-DRA, HLA-DRB1, HLA-DRB3, HLA-DRB4, HLA-DRB5, HLA-E, HLA-F, HLA-G, HSP90AA1, HSP90AB1, HSPA1A, HSPA1B, HSPA1L, HSPA2, HSPA4, HSPA5, HSPA6, HSPA8, IFI30, IFNG, KIR2DL1, KIR2DL2, KIR2DL3, KIR2DL4, KIR2DL5A, KIR2DS1, KI…	4	5	5.41319e-05	0.00341031
Apoptosis	[BAX, BCL2, TNF, TNFRSF1A, TP53]	[AKT1, APAF1, BAD, BAK1, BAX, BBC3, BCL2, BCL2L1, BCL2L11, BCL2L2, BID, BIRC2, BIRC3, BIRC5, BNIP3L, BOK, CASP1, CASP10, CASP2, CASP3, CASP4, CASP6, CASP7, CASP8, CASP9, CDKN2A, CFLAR, CHUK, CRADD, CYCS, DFFA, DFFB, DIABLO, FADD, FAS, FASLG, GZMB, HELLS, HRK, IGF1, IGF1R, IGF2, IKBKB, IKBKG, IRF1, IRF2, IRF3, IRF4, IRF5, IRF6, IRF7, JUN, LTA, MAP2K4, MAP3K1, MAPK10, MCL1, MDM2, MYC, NFKB1, NFKBIA…	5	5	2.64612e-06	0.000203751
B cell homeostasis	[BAX, BCL2, MIF]	[ADA, AMH, BAK1, BAX, BCL10, BCL2, BCL2L11, CASP3, CD74, CLSTN1, FOXP3, HIF1A, IKBKB, IKBKG, LYN, MEF2A, MEF2C, MIF, NCKAP1L, PIK3CD, PPP2R3C, RC3H1, RC3H2, S100A8, S100A9, SH2B2, SPNS2, TNFAIP3, TNFRSF13B, TNFRSF13C, TNFSF13B]	3	5	7.225e-05	0.00426275
BH3 domain binding	[BAX, BCL2]	[BAX, BCL2, BCL2L1, MCL1]	2	5	4.02685e-05	0.00261745
cell aging	[BCL2, LMNA, MIF, NPM1, TP53]	[AMH, ANTXR1, ARNTL, ATM, ATR, BCL2, BGLAP, BRCA2, C2orf40, CALR, CDK1, CDK6, CDKN1A, CDKN2A, CHEK1, CHEK2, CITED2, CTC1, DNAJA3, ENG, ERCC1, FOXM1, FZR1, HMGA1, HMGA2, HRAS, HTT, ICAM1, ID2, ILK, ING2, ING3, INGX, KAT6A, LIMS1, LMNA, MAGEA2, MAGEA2B, MAP2K1, MAPK14, MAPKAPK5, MARCH5, MED12, MIF, MMAB, MME, MMP12, MNT, MORC3, NEK6, NOX4, NPM1, NSMCE2, NUAK1, NUP62, OPA1, PAK3, PDCD4, PLA2R1, PML,…	5	5	4.14958e-06	0.000311218
cysteine-type endopeptidase regulator activity involved in apoptotic process	[GNB2L1, PRDX3, SNCA]	[APAF1, ARRB1, AVP, BAD, BCL2L13, BIRC5, CARD8, CASP1, CASP8AP2, CD27, CDKN1B, CTSH, DPEP1, FOXL2, GAS6, GNB2L1, IFNAR1, LEF1, MAP3K5, MAPK9, MT3, NAIP, NGFRAP1, NKX3-1, NLRP1, NLRP12, NLRP3, NOD1, PRDX3, PRDX5, PYCARD, RPS27L, RPS6KA1, RPS6KA3, SERPINB9, SNCA, TFAP2B, TNFAIP8, TNFSF14, VIL1, XIAP]	3	5	0.000168217	0.00874729
Death Receptor Signalling	[TNF, TNFRSF1A]	[ADAM17, CASP10, CASP8, CFLAR, FADD, FAS, FASLG, RIPK1, TNF, TNFRSF10B, TNFRSF1A, TNFSF10, TRADD, TRAF2]	2	5	0.000600593	0.0252249
development of secondary sexual characteristics	[BAX, PHB2]	[AREG, B4GALT1, BAX, IRF2BPL, LHCGR, MBD4, MED1, NCOA3, PHB2, STAT5A, STAT5B, TGFB1, WNT5A]	2	5	0.000515657	0.0226889
DNA replication-independent nucleosome assembly	[H3F3A, NPM1, RUVBL1]	[ASF1A, ASF1B, ATRX, CABIN1, CASC5, CENPA, CENPH, CENPI, CENPK, CENPN, CENPO, CENPP, CENPQ, CENPU, CENPW, H3F3A, HAT1, HIRA, HIST1H4A, HJURP, IPO4, ITGB3BP, MIS18A, MIS18BP1, NASP, NPM1, OIP5, RBBP4, RBBP7, RSF1, RUVBL1, SMARCA5, UBN1]	3	5	8.73742e-05	0.0050677
Extrinsic Pathway for Apoptosis	[TNF, TNFRSF1A]	[ADAM17, CASP10, CASP8, CFLAR, FADD, FAS, FASLG, RIPK1, TNF, TNFRSF10B, TNFRSF1A, TNFSF10, TRADD, TRAF2]	2	5	0.000600593	0.0252249
FAS pathway and Stress induction of HSP regulation	[BCL2, LMNA, TNF]	[APAF1, ARHGDIB, BCL2, CASP10, CASP3, CASP6, CASP7, CASP8, CASP9, CFLAR, CYCS, DAXX, DFFA, DFFB, FADD, FAF1, FAS, FASLG, HSPB1, IL1A, JUN, LMNA, LMNB1, LMNB2, MAP2K4, MAP3K1, MAP3K7, MAPK8, MAPKAPK2, MAPKAPK3, PAK1, PAK2, PARP1, PRKDC, RB1, RIPK2, SPTAN1, TNF]	3	5	0.000144747	0.0076716
Glycolysis	[ALDOA, ENO1, PKM]	[732165, ALDOA, ALDOB, ALDOC, ENO1, ENO2, ENO3, GAPDH, GAPDHS, GPI, LOC642969, PFKFB1, PFKFB2, PFKFB3, PFKFB4, PFKL, PFKM, PFKP, PGAM1, PGAM2, PGK1, PKLR, PKM, PPP2CA, PPP2CB, PPP2R1A, PPP2R1B, PPP2R5D, TPI1, TPI1P1]	3	5	6.53784e-05	0.0039227
Glycolysis and Gluconeogenesis	[ALDOA, ENO1, PGK2, PKM]	[ ALDOA, ALDOB, ALDOC, DLAT, DLD, ENO1, ENO2, ENO3, FBP1, FBP2, G6PC, GAPDH, GAPDHS, GCK, GOT1, GOT2, GPI, HK1, HK2, HK3, LDHA, LDHAL6B, LDHB, LDHC, MDH1, MDH2, PC, PCK1, PDHA1, PDHA2, PDHB, PDHX, PFKL, PFKM, PFKP, PGAM1, PGAM2, PGK1, PGK2, PKLR, PKM, SLC2A1, SLC2A2, SLC2A3, SLC2A4, SLC2A5, TPI1]	4	5	8.08633e-06	0.000598388
glycolytic process	[ALDOA, DDIT4, ENO1, PGK2, PKM]	[ADPGK, ALDOA, ALDOB, ALDOC, ARNT, BPGM, DDIT4, DHTKD1, ECD, ENO1, ENO2, ENO3, ENO4, ENTPD5, FBP1, GAPDH, GAPDHS, GCK, GNPDA1, GPD1, GPI, HDAC4, HIF1A, HK1, HK2, HK3, HKDC1, HOOK1, HOOK2, HOOK3, HTR2A, IER3, IGF1, INS, INSR, K7ESF4_HUMAN, KCNA4, KCNA5, KIF2A, LDHA, LDHAL6A, LDHAL6B, LDHB, LDHC, MAP4K2, MIA3, MLXIPL, NCOR1, OGDH, OGDHL, OGT, PDHA1, PDHA2, PFKFB1, PFKFB2, PFKFB3, PFKFB4, PFKL, PFKM…	5	5	2.07674e-06	0.000161986
hydrogen peroxide catabolic process	[PRDX1, PRDX3, SNCA]	[APOA4, CAT, DLC1, DUOX1, DUOX2, EPX, GLYAT, GPX1, GPX3, GPX4, HBA1, HBB, HP, HPR, KRT89P, LPO, MPO, PRDX1, PRDX2, PRDX3, PRDX5, PRDX6, PXDN, PXDNL, SNCA, THPO, TPO]	3	5	4.73624e-05	0.0030312
Integrated Cancer pathway	[BAX, BCL2, TP53]	[651610, 651921, AKT1, ATM, ATR, BAD, BARD1, BAX, BCL2, BLM, BRCA1, CASP3, CASP8, CASP9, CDC25A, CDC25B, CDK1, CDK2, CDK4, CHEK1, CHEK2, E2F1, JAK1, MDM2, MMP1, MRE11A, MSH2, MSH6, NOXA1, PLK1, PTEN, RAD50, RB1, SMAD2, SMAD3, STAT1, TP53]	3	5	0.000123518	0.0067935
intrinsic apoptotic signaling pathway by p53 class mediator	[BAX, DDIT4, MIF, TP53]	[AEN, AMH, BAG6, BAX, BCL3, BDKRB2, BOK, BRCA2, CD44, CD74, CDIP1, CDKN1A, DDIT4, DDX5, DYRK2, E2F1, E2F2, EDA2R, ELL3, EP300, FHIT, HINT1, HIPK1, HIPK2, IFI16, ING2, ING3, INGX, JMY, KDM1A, MIF, MSH2, MSX1, MUC1, MYBBP1A, NUPR1, PAK3, PDK2, PERP, PGAP2, PHLDA3, PMAIP1, PML, PPP1R13B, PPP2R5C, PYCARD, RPS27L, RRM2B, RRN3, RRP8, S100A8, S100A9, SHISA5, SIRT1, SNW1, STEAP3, STK11, TAF9, TAF9B, TMEM…	4	5	3.36097e-05	0.00221824
intrinsic apoptotic signaling pathway in response to DNA damage	[BAX, BCL2, DDIT4, MIF, TNF, TNFRSF1A, TP53]	[ABL1, ACKR3, AEN, AMH, ATM, BAD, BAG6, BAK1, BAX, BCL2, BCL2A1, BCL2L1, BCL2L10, BCL2L11, BCL2L2, BCL2L2-PABPN1, BCL3, BOK, BRCA1, BRCA2, CASP14, CASP16, CASP2, CASP9, CCAR2, CD44, CD74, CDIP1, CDKN1A, CDKN2D, CHEK2, CIDEB, CLU, CNRIP1, CRIP1, CXCL12, DDIT4, DYRK2, E2F1, EI24, ELL3, EP300, EPHA2, ERCC6, FBXO18, FNIP2, HIC1, HIPK1, HIPK2, HMOX1, HTRA2, IER3, IFI16, IKBKE, ING2, ING3, INGX, KDM1A,…	7	10	2.28797e-08	1.83038e-06
Intrinsic Pathway for Apoptosis	[BAX, BCL2, TP53]	[AKT1, AKT2, AKT3, APAF1, BAD, BAK1, BAX, BBC3, BCL2, BCL2L1, BCL2L11, BID, BMF, CASP3, CASP7, CASP8, CASP9, CYCS, DIABLO, DYNLL1, DYNLL2, E2F1, GZMB, LOC441488, MAPK8, NMT1, PMAIP1, PPP3CC, PPP3R1, SFN, TFDP1, TP53, WDR92, XIAP, YWHAB, YWHAE, YWHAEP5, YWHAG, YWHAH, YWHAQ, YWHAZ]	3	5	0.000168217	0.00874729
maintenance of protein localization in endoplasmic reticulum	[HSPA5, PDIA3]	[ANKRD13C, GPAA1, GRIK5, HSPA5, KDELR1, KDELR2, KDELR3, OS9, PDIA2, PDIA3]	2	5	0.000298992	0.0143516
NADPH-hemoprotein reductase activity	[NOS2, VDAC2]	[CYB5R4, MTRR, NANOS1, NANOS2, NANOS3, NDOR1, NOS1, NOS2, NOS3, POR, VDAC2]	2	5	0.000364824	0.0167819
negative regulation of peptidyl-serine phosphorylation	[BAX, DDIT4]	[BAK1, BAX, BDKRB2, CAV1, CNKSR3, DDIT4, DKK1, DMD, DMTN, GPD1L, INPP5J, INPP5K, MLXIPL, PAQR3, PDE4D, PPM1F, SMAD7, TNDM]	2	5	0.00100305	0.0391191
phospholipase inhibitor activity	[ANXA5, SNCA]	[ANGPTL3, ANXA1, ANXA2, ANXA2P2, ANXA3, ANXA4, ANXA5, APOC1, PDC, PINLYP, PNKD, SCGB1A1, SNCA, SNCB]	2	5	0.000600593	0.0252249
positive regulation of alcohol biosynthetic process	[SNCA, TNF, VDAC2]	[ABCG1, ACSL3, ADCYAP1R1, BMP6, DHX34, DHX8, FGF1, GPER1, HRH1, IFNG, LHCGR, MAS1, P2RY1, POR, POU1F1, PRKAA1, PTH1R, SNCA, SREBF1, TNF, VDAC2, WNT4]	3	5	2.51669e-05	0.00171135
positive regulation of chemokine (C-X-C motif) ligand 2 production	[MIF, TNF]	[AMH, CD74, MIF, S100A8, S100A9, TIRAP, TNF]	2	5	0.000140233	0.00757257
positive regulation of developmental pigmentation	[BAX, BCL2]	[ADAMTS20, ADAMTS9, BAX, BCL2, BLOC1S5, BLOC1S6, HPS4, KITLG, ZEB2]	2	5	0.000239595	0.0117402
positive regulation of neuron death	[BAX, DDIT4, TNF, TP53]	[AGRN, APOE, ASCL1, ATF4, ATM, BAD, BAG1, BAX, BBC3, BCL2L11, CASP2, CASP3, CASP7, CASP9, CCL3, CDC34, CDC42, CDK5, CDK5R1, CLU, DAXX, DDIT3, DDIT4, EGR1, EPHA7, FASLG, FGFR3, FOXO3, GRIK5, ITGA1, JUN, MAP2K4, MAP2K7, MAP3K11, MAP3K5, MUSK, NCF2, NF1, NQO1, NR3C1, PCSK9, PICALM, PMAIP1, RAPSN, RHOA, SRPK2, TFAP2A, TFAP2B, TGFB2, TNF, TP53, UBE2M, ZNF746]	4	5	1.10902e-05	0.000798493
positive regulation of oxidoreductase activity	[SNCA, TNF, VDAC2]	[ABL1, ABL2, AGT, AGTR1, AGTR2, AGXT, AKT1, APOE, ATP7A, CALM1, CALM2, CCS, CDH15, CDH3, CYP27B1, EDN1, EDN2, ESR1, FCER2, FGF23, FTMT, FXN, GCH1, GDNF, HIF1A, HTR2B, IFNG, IL1B, INS, KRAS, NOD2, NPR3, NPRL3, PARK7, POR, RFK, RIPK3, SCARB1, SNCA, TNF, VDAC2, VDR]	3	5	0.000180824	0.00922201
positive regulation of protein oligomerization	[BAX, GNB2L1, TP53]	[AIM2, BAX, BBC3, BCL2L11, BID, BIK, BMF, CCK, FAS, FASN, GNB2L1, HRK, IDE, IGJ, MIEF2, PMAIP1, RIPK2, SH3GLB1, SNX9, TP53]	3	5	1.86989e-05	0.00132762
positive regulation of steroid biosynthetic process	[TNF, VDAC2]	[ABCG1, BMP6, CYP17A1, FGF1, IFNG, IGF1R, IGF2, NR1D1, POR, PRKAA1, SREBF1, TNF, VDAC2, WNT4]	2	5	0.000600593	0.0252249
post-embryonic camera-type eye morphogenesis	[BAX, HMGN1]	[BAK1, BAX, HMGN1]	2	5	2.0168e-05	0.00141176
programmed necrotic cell death	[BAX, TNF, TP53]	[ALKBH7, ARHGEF2, BAX, BIRC2, BIRC3, CASP1, CASP8, CFLAR, CYLD, DNM1L, FADD, FAS, FASLG, FASN, IRF3, MAP3K5, MAP3K7, MAPK8, MLKL, PGAM5, PPIF, PYGL, RBCK1, RIPK1, RIPK3, SIRT2, SLC25A4, TANK, TLR3, TNF, TP53, TRAF2, TRPM7, YBX3]	3	5	9.56534e-05	0.00545224
protein import into nucleus, translocation	[TNF, TNFRSF1A, TP53]	[ABRA, AGAP3, AKR1C3, AKT1, ARNTL, BCL3, BCL6, CDK1, CDKN1A, CEP57, GAS6, GCKR, HSP90AB1, IFNG, IGF1, IL6, JAK2, KPNB1, MAP4K5, MAVS, MBD4, MED1, MT3, NFKBIA, OGG1, OPRD1, OR1D2, PAK3, PARP10, PDE2A, POLA2, RBM22, SEC61B, SIRT1, SLC11A1, TGFB1, TMEM173, TNF, TNFRSF1A, TNPO1, TP53, TXN, UBR5]	3	5	0.000194028	0.00970141
protein insertion into mitochondrial membrane involved in apoptotic signaling pathway	[BAX, BCL2, TP53]	[AKT1, BAD, BAX, BBC3, BCL2, BCL2L11, BID, BMF, CASP8, DYNLL1, DYNLL2, E2F1, GZMB, MAPK8, MOAP1, NMT1, PMAIP1, PPP3CC, PPP3R1, REXO2, SFN, SH3GLB1, TFDP1, TP53, YWHAB, YWHAE, YWHAG, YWHAH, YWHAQ, YWHAZ]	3	5	6.53784e-05	0.0039227
reactive oxygen species metabolic process	[BCL2, DDIT4, NOS2, PRDX1, PRDX3, SNCA, TNF, TP53]	[AATF, ACE2, ACP5, AGT, AGTR1, AGXT, AIFM2, AKR1C3, ALOX12, AOX1, APOA4, ARF4, ATP7A, ATPIF1, BCL2, BCO2, BIRC2, BIRC3, BMP7, BNIP3, BRCA1, C12orf5, CAT, CCS, CD36, CDKN1A, CRYAB, CTGF, CYB5R4, CYBA, CYBB, CYP1A1, CYP1A2, CYP1B1, CYR61, DDIT4, DLC1, DRD5, DUOX1, DUOX2, DUOXA1, DUOXA2, EDN1, EGFR, EPHX2, EPX, F2, F2RL1, FANCC, FBLN5, FOXM1, GADD45A, GLS2, GLYAT, GPX1, GPX3, GPX4, GRB2, GSTP1, HBA1…	8	10	7.63319e-09	6.18288e-07
regulation of cell aging	[LMNA, MIF, TP53]	[AMH, ARNTL, CDK6, CDKN2A, FOXM1, FZR1, HMGA1, HMGA2, ING2, ING3, INGX, LMNA, MARCH5, MIF, NEK6, NUAK1, PNPT1, PTEN, RSL1D1, S100A8, S100A9, SIRT1, TP53, TP63, TWIST1, VASH1, WNT1, ZKSCAN3, ZNF277]	3	5	5.8949e-05	0.00365484
regulation of lymphocyte apoptotic process	[BAX, MIF, TP53]	[ADA, ADAM8, AMH, AURKB, BAX, BBC3, BCL10, BCL6, BIRC7, BLM, BMP4, BPNT1, BTK, CASP8, CCL5, CD27, CD3G, CD74, DOCK8, FADD, FNIP1, GPAM, HIF1A, HSH2D, IDO1, IL10, IL2, IRS2, JAK3, LGALS16, LGALS3, LYN, MIF, NFKBID, NOC2L, PDCD7, PIP, PRELID1, PRKCQ, PTCRA, PTEN, RAG1, RIPK3, RORC, S100A8, S100A9, SIGLEC1, SLC46A2, TARP, TGFB2, TP53, TSC22D3, WNT5A, ZC3H8]	3	5	0.000382164	0.0171974
regulation of mammary gland epithelial cell proliferation	[BAX, PHB2]	[AGAP2, BAX, BRCA2, CCND1, DEAF1, ETV4, GATA3, GPX1, HOXA5, IQGAP3, MBD4, MED1, PHB2, PYGO2, ROBO1, ZNF703]	2	5	0.000789345	0.0323632
regulation of mitochondrial depolarization	[BCL2, GNB2L1]	[ALOX12, BCL2, CCK, GCLC, GCLM, GNB2L1, HSH2D, IFI6, LRRK2, MGEA5, MLLT11, MYOC, PPP2R3C, RIPK2, SRC, TSPO]	2	5	0.000789345	0.0323632
regulation of mitochondrial membrane potential	[BAX, BCL2, GNB2L1, PRDX3]	[ABL1, ADORA2A, ALOX12, ARL6IP5, BAD, BAK1, BAX, BCL2, BCL2L1, BCO2, C22orf29, CASP1, CCK, CLIC1, EYA1, GCLC, GCLM, GNB2L1, HEBP2, HSH2D, HTT, IFI6, LRRK2, MGEA5, MLLT11, MYOC, NDUFS1, OPN1SW, OPRD1, PANK2, PARK7, PID1, PINK1, PMAIP1, PPP2R3C, PRDX3, PRELID1, PYCR1, RIPK2, SLC25A27, SLC6A4, SMYD1, SOD1, SOD2, SPG20, SRC, STOML2, TSPO, TUSC2, UCP2]	4	5	8.77261e-06	0.0006404
regulation of mitochondrial outer membrane permeabilization involved in apoptotic signaling pathway	[BAX, BCL2, TP53]	[ACAA2, AKT1, ATPIF1, BAD, BAK1, BAX, BBC3, BCL2, BCL2L11, BID, BMF, CASP8, DYNLL1, DYNLL2, E2F1, GSK3A, GSK3B, GZMB, IER3, MAPK8, MPV17L, MUL1, NMT1, PMAIP1, PPP3CC, PPP3R1, REXO2, SFN, SH3GLB1, SIVA1, SLC25A5, SLC35F6, TFDP1, TMEM102, TP53, YWHAB, YWHAE, YWHAG, YWHAH, YWHAQ, YWHAZ, ZNF205]	3	5	0.000180824	0.00922201
regulation of nitrogen utilization	[BAX, BCL2]	[BAX, BCL2, NR1H4]	2	5	2.0168e-05	0.00141176
regulation of nuclease activity	[HSPA5, LMNA, NPM1]	[ACADVL, ACD, ADD1, ARFGAP1, ARFGAP3, ASNS, ATF3, ATF4, ATF6, ATP6V0D1, C19orf10, CALR, CCL2, CTDSP2, CUL7, CXCL8, CXXC1, DCTN1, DDIT3, DDX11, DNAJB11, DNAJB9, DNAJC3, EDEM1, EIF2AK3, EIF2S1, ERN1, EXTL3, FKBP14, GFPT1, GOSR2, GSK3A, GZMA, HDGF, HERPUD1, HMGB2, HSP90B1, HSPA5, HYOU1, IGFBP1, KDELR3, KLHDC3, LMNA, MBTPS1, MBTPS2, NEIL1, NPM1, OAS1, OAS3, PARP16, PCNA, PDIA5, PDIA6, PLA2G4B, PPP2R5…	3	5	0.00100102	0.0400408
regulation of organic acid transport	[MIF, SNCA, TNF]	[ACSL4, ACSL6, ADORA1, ADORA2A, AGTR2, AKT1, AKT2, AMH, ARG1, AVP, AVPR1A, CYP4A11, CYP4F2, DPYSL2, FAM132B, GRIK1, GRM7, HRH3, HTR6, IFNAR1, IL1B, IL1RN, IRS2, LEP, MAPK9, MIF, NCOR1, NLRP3, NPY5R, OXT, P2RX4, PER2, PLA2G10, PLA2G6, PLA2R1, REPIN1, S100A8, S100A9, SEPT2, SEPT6, SLC6A1, SNCA, SYK, THBS1, TINAGL1, TMEM27, TNF, TNFRSF11A, TNFSF11, TRH]	3	5	0.000304214	0.014298
regulation of peptidyl-serine phosphorylation	[BAX, BCL2, DDIT4, MIF, SNCA, TNF]	[AKT1, AMH, ANGPT1, ARAF, ARRB1, ATP2B4, AVP, AXIN1, BAG4, BAK1, BAX, BCAR3, BCL2, BDKRB2, BDNF, BDNF-AS, BRAF, CAPRIN2, CAV1, CCM2, CD44, CDC42, CNKSR3, CREBL2, CSF3, DDIT4, DKK1, DMD, DMTN, DOCK7, FNIP1, FNIP2, GAS6, GCG, GPD1L, GSK3A, GSK3B, HAX1, HCLS1, HRC, IFNA1, IFNA10, IFNA13, IFNA14, IFNA16, IFNA17, IFNA21, IFNA4, IFNA5, IFNA6, IFNA7, IFNA8, IFNAR1, IFNB1, IFNE, IFNG, IFNK, IFNW1, IL11, …	6	10	3.11359e-07	2.45973e-05
release of cytochrome c from mitochondria	[BAX, BCL2, LMNA, TP53]	[AKT1, APOPT1, ARRB2, ATP7A, AVP, BAD, BAK1, BAX, BBC3, BCL2, BCL2L1, BCL2L11, BID, BIK, BMF, BNIP3, CASP3, CASP7, CCK, CLU, DNM1L, FAM162A, FIS1, FXN, GGCT, GPER1, GPX1, HGF, HIGD1A, HRK, IFI6, IFNAR1, IGF1, IL6, JUN, LMNA, MAPK9, MED12, MFF, MLLT11, MOAP1, NLRP3, OPA1, PARK2, PARL, PINK1, PLA2G6, PMAIP1, PPIF, PRELID1, PSMD10, PYCARD, REXO2, RIPK2, SFN, SOD2, SOS1, TIMM50, TNFSF10, TP53, TP73, …	4	5	2.0765e-05	0.00143279
response to salt stress	[BAX, TNF, TP53]	[AGT, AGXT, ANXA7, AQP1, AQP2, AQP4, AVP, BAX, BDKRB2, CAPN3, CYP11A1, EPO, EPX, HSP90AB1, IFNAR1, KMO, MKNK1, NEDD4L, NLRP3, OXT, SLC12A6, TACR3, TH, TIMP1, TNF, TP53, TRPV4, XRCC5, XRCC6]	3	5	5.8949e-05	0.00365484
retinal cell programmed cell death	[BAX, BCL2]	[BAX, BCL2, BDNF, BDNF-AS, CNTF, FASLG, SLC4A7]	2	5	0.000140233	0.00757257
Selenium Pathway	[PRDX1, PRDX3, TNF]	[ABCA1, ALB, ALOX15B, ALOX5, ALOX5AP, APOA1, APOB, CAT, CBS, CCL2, CRP, CTH, DIO1, F2, F7, FLAD1, GGT1, GSR, HBA1, HBA2, HBB, ICAM1, IFNG, IL1B, IL6, INS, INSR, KMO, KYNU, LDLR, MPO, MTHFR, MTR, NFKB1, NFKB2, PLAT, PLG, PNPO, PRDX1, PRDX2, PRDX3, PRDX4, PRDX5, PTGS1, PTGS2, RELA, RFK, SAA1, SAA2, SAA2-SAA4, SAA4, SCARB1, SERPINA3, SERPINE1, SOD1, SOD2, SOD3, TNF, TXN, XDH]	3	5	0.000521458	0.0224227
T cell lineage commitment	[BCL2, TP53]	[BATF, BCL2, IL12B, IL12RB1, IL23A, IL23R, IL4, IL6, IL7, IRF4, PRKDC, RAG2, SHH, STAT6, TP53, ZFPM1]	2	5	0.000789345	0.0323632
thioredoxin peroxidase activity	[PRDX1, PRDX3]	[PRDX1, PRDX2, PRDX3, PRDX4]	2	5	4.02685e-05	0.00261745
TNF signaling	[TNF, TNFRSF1A]	[ADAM17, RIPK1, TNF, TNFRSF1A, TRADD, TRAF2]	2	5	0.000100334	0.00561872
TP53 network	[BAX, BCL2, TP53]	[651610, ABL1, ATM, BAX, BBC3, BCL2, BID, BOK, CDKN1A, CDKN2A, GADD45A, MDM2, MYC, OTX2, PMAIP1, SUMO1, TNFSF10, TP53, TP63, TP73]	3	5	1.86989e-05	0.00132762
